# Supplementary material for: BiPOLES is an optogenetic tool developed for bidirectional dual-color control of neurons
Source: Springer Nature journal article supplement (doi:10.1038/s41467-021-24759-5), 2021-07-26
Supplement: MOESM1 [file 41467_2021_24759_MOESM1_ESM.pdf]

1 **BiPOLES is an optogenetic tool developed for bidirectional dual-color control of neurons**

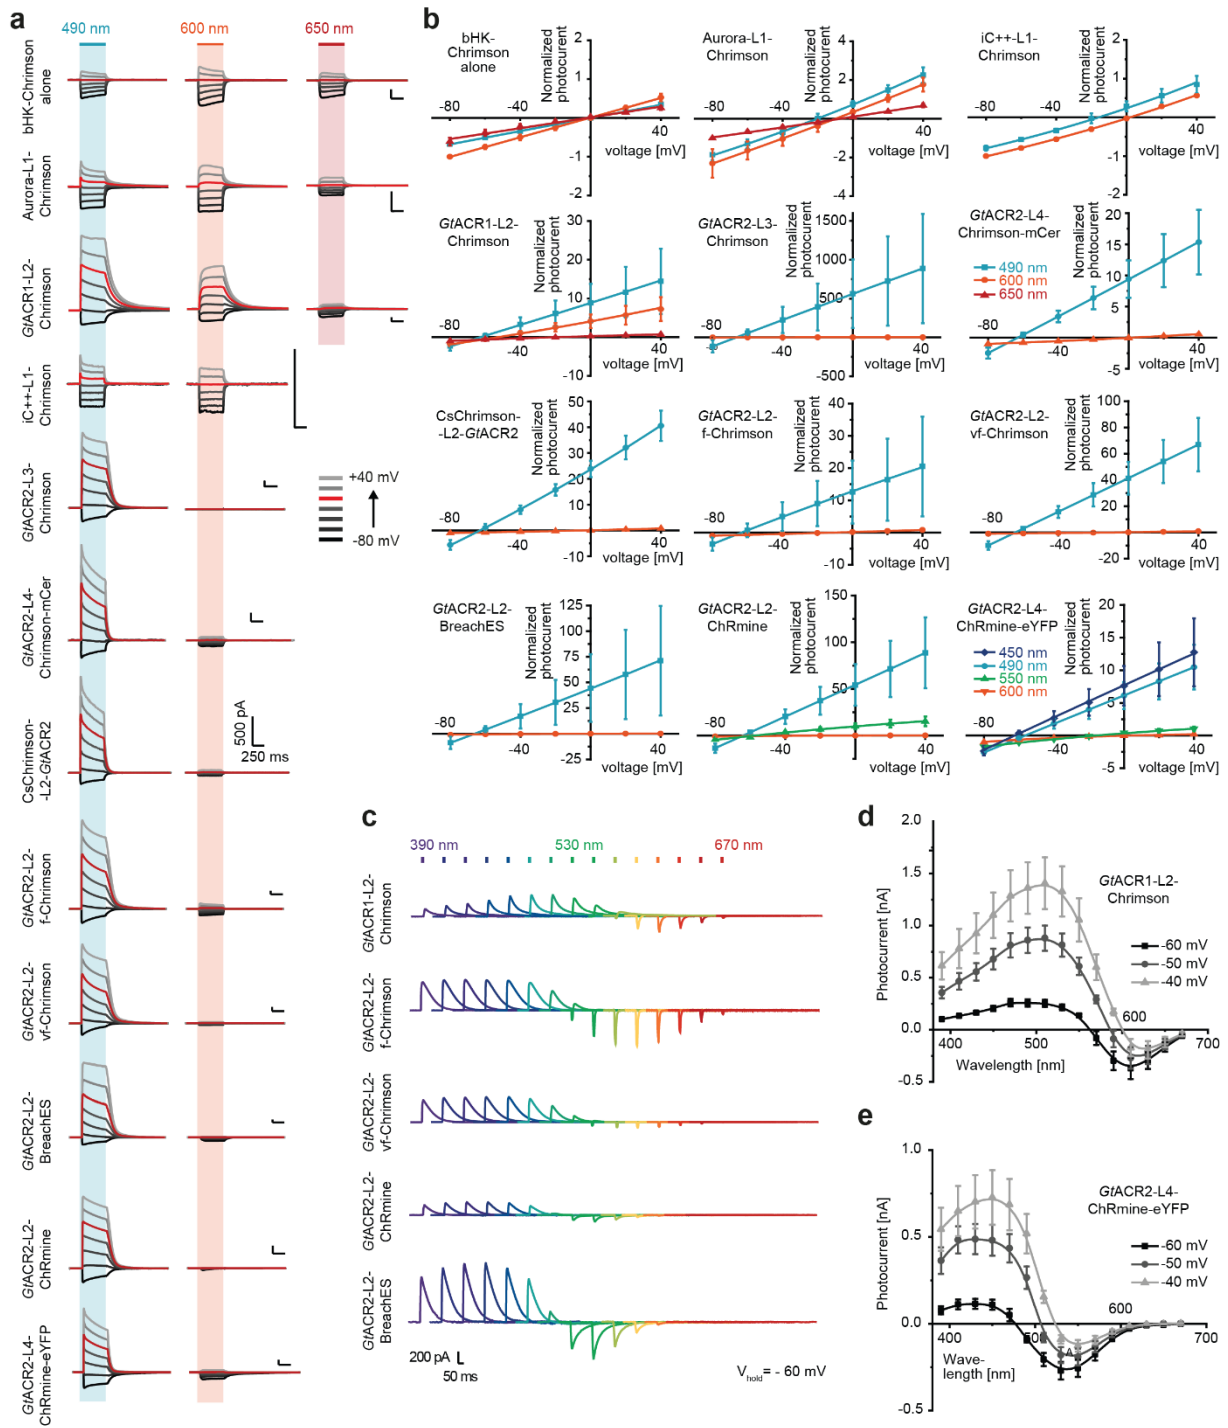

2

3 **Supplementary Fig. 1. Biophysical characterization of different ACR-CCR tandem constructs. (a)**

4 Representative photocurrents of  $\beta$ HK-Chrimson and different tandem constructs as described in Fig.  
5 1a. **(b)** Normalized peak photocurrents of  $\beta$ HK-Chrimson and tandem constructs at different membrane  
6 voltages evoked at 450 nm, 490 nm, 530 nm or 600 nm (see panel (a), mean  $\pm$  SD; n indicates number  
7 of independent cells. n = 4 for  $\beta$ HK-Chrimson; n = 5 for Aurora-L1-Chrimson, CsChrimson-L2-GtACR2  
8 and GtACR2-L2-f-Chrimson; n = 6 for GtACR2, GtACR1-L2-Chrimson and GtACR2-L2-vf-Chrimson; n  
9 = 7 for iC++-L1-Chrimson, GtACR2-L3-Chrimson, GtACR2-L4-Chrimson-mCer, GtACR2-L2-BreachES  
10 and GtACR2-L2-ChRmine; n = 8 for GtACR2-L2-Chrimson and n = 9 for GtACR2-L4-ChRmine-ts-  
11 eYFP-er); normalized to the peak photocurrent at -80 mV and 600 nm illumination). **(c)** Representative  
12 photocurrents of different ACR-CCR tandems with 10 ms light pulses at indicated wavelengths and  
13 equal photon flux at -60 mV. **(d, e)** Action spectra of GtACR1-L2-Chrimson and GtACR2-L4-ChRmine-

14 TS-eYFP-ER at different membrane voltages (mean  $\pm$  SEM, n = 6 for *GtACR1-L2-Chrimson* and n = 8  
15 for *GtACR2-L4-ChRmine-TS-eYFP-ER*). The data presented in this figure are provided in the Source  
16 Data file.  
17

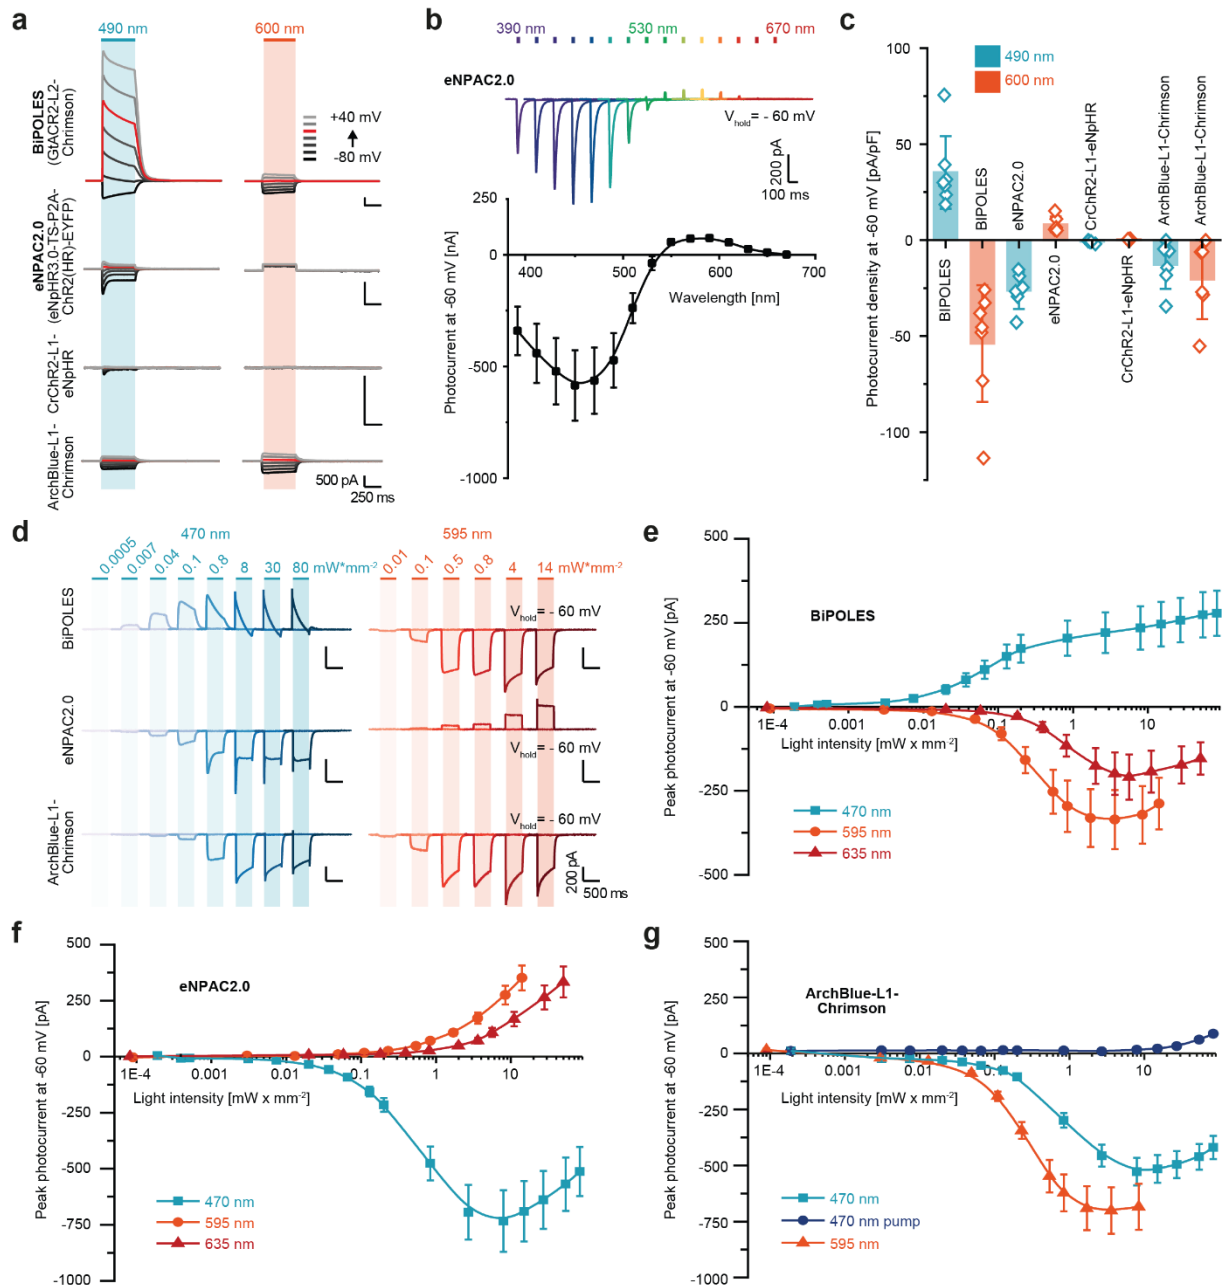

18

19 **Supplementary Fig. 2. Comparison of BiPOLES to established bidirectional optogenetic tools in**  
 20 **HEK293 cells.** (a) From top to bottom: representative photocurrents of BiPOLES, eNPAC2.0  
 21 (eNpHR3.0-TS-p2A-CrChR2(H134R)-EYFP), CrChR2-L1-eNpHR<sup>2</sup> and ArchBlue-L1-Chrimson in  
 22 whole-cell patch clamp recordings from HEK293 cells at 490 nm and 600 nm illumination. ArchBlue  
 23 stands for the blue shifted mutant of Arch3.0<sup>26</sup>. (b) Top: Representative photocurrents of eNPAC2.0 with  
 24 10 ms light pulses at indicated wavelengths and equal photon flux at -60 mV. Bottom: Action spectrum  
 25 of eNPAC2.0 at -60 mV (mean  $\pm$  SEM, n = 5). (c) Peak photocurrent densities for 490 nm and 600 nm  
 26 excitation at -60 mV (close to the neuronal resting potential) as shown in (a) (Mean  $\pm$  SD; n indicates  
 27 number of independent cells. n = 5 for CrChR2-L1-NpHR; n = 6 for ArchBlue-L1-Chrimson and  
 28 eNPAC2.0, n = 7 for BiPOLES). (d) Representative photocurrents of BiPOLES (top), eNPAC2.0(middle)  
 29 and ArchBlue-L1-Chrimson (bottom) at -60 mV and different irradiances and wavelengths. (e-g) Peak  
 30 photocurrents at different irradiances, different excitation wavelength and -60 mV according to (d).  
 31 (mean  $\pm$  SEM, n = 4 for ArchBlue-L1-Chrimson and n = 6 for BiPOLES and eNPAC2.0) 6). Pump  
 32 currents at 470 nm in (g) describe the initial outward currents observed directly after blue light switching  
 33 in (d). The data presented in this figure are provided in the Source Data file.

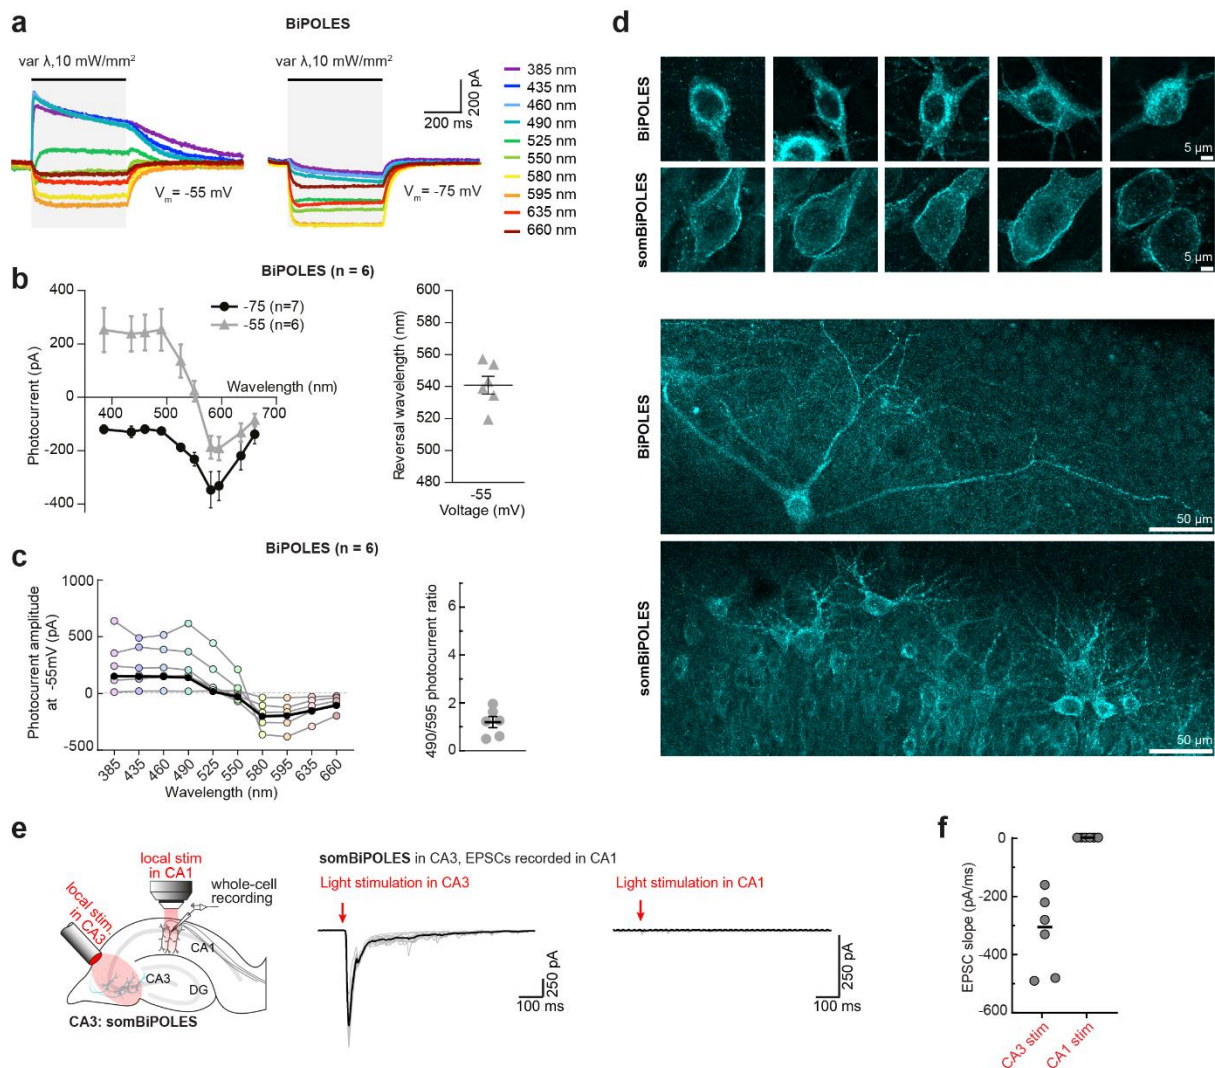

34

35 **Supplementary Fig. 3. Biophysical characterization of BiPOLES and differential expression of**  
 36 **BiPOLES and somBiPOLES in CA1 pyramidal neurons. (a)** Representative photocurrent traces of  
 37 BiPOLES in CA1 pyramidal neurons upon illumination with different wavelengths and equal photon flux  
 38 at membrane voltages above (left) and below (right) the chloride Nernst potential. **(b)** Left: Quantification  
 39 of photocurrent amplitude along the spectrum at a membrane voltage of -55 mV (grey) and -75 mV  
 40 (black). Symbols indicate mean  $\pm$  SEM and lines are interpolations of data points ( $n_{-55 \text{ mV}} = 6$  cells,  $n_{-75 \text{ mV}} = 7$   
 41 cells). Similar to HEK-cell measurements, inward and outward photocurrents were evoked with  
 42 635 nm and 490 nm at a membrane voltage between the chloride and proton Nernst potentials,  
 43 respectively, indicative of independently evoked Chrimson- and *GtACR2*-photocurrents. Right:  
 44 Quantification of photocurrent reversal wavelength at -55 mV (mean  $\pm$  SEM,  $n = 6$  cells). **(c)** Left:  
 45 Quantification of photocurrent amplitudes at -55 mV (same data as in (b) but showing individual data  
 46 points for each wavelength, black circles: medians,  $n = 6$  cells). Right: Ratio of inhibitory (490 nm) over  
 47 excitatory (595 nm) photocurrents (mean  $\pm$  SEM,  $n = 6$  cells). Note that, unlike for eNPAC2.0  
 48 (Supplementary Fig. 8a) the photocurrent ratio shows little variability between cells, indicating a  
 49 reproducible stoichiometry of Chrimson and *GtACR2* currents. **(d)** Maximum-intensity projections of  
 50 confocal images showing expression of BiPOLES or soma-targeted BiPOLES (somBiPOLES) in CA3  
 51 pyramidal neurons of organotypic hippocampal slices. For each opsin 5 representative neurons from 5  
 52 organotypic slices are shown (top rows). Bottom: lower-magnification example images of CA3 neurons  
 53 in *stratum oriens* show confinement of somBiPOLES to soma and proximal dendrites. These images  
 54 were not used for quantitative analysis. CA3 cells were transduced with an AAV9 encoding for either  
 55 BiPOLES or somBiPOLES and fixed after 20 days. Fluorescence was enhanced by an antibody staining  
 56 against the fluorophore mCerulean. **(e)** Left: Schematic drawing depicting the experiment used to verify

57 absence of somBiPOLES-expression in axon terminals of CA3 cells. Whole-cell voltage-clamp  
 58 recordings were done in postsynaptic CA1 cells to determine red-light evoked EPSCs. Illumination was  
 59 done locally either in CA3 at the somata or in CA1 at axon terminals of somBiPOLES-expressing CA3  
 60 cells. Axon stimulation was done in the presence of TTX to avoid antidromic spiking of CA3 cells and 4-  
 61 AP to inhibit K<sup>+</sup>-mediated fast repolarization. Middle: Example voltage-clamp recordings from CA1 cells  
 62 upon red-light stimulation in CA3. Right: example voltage-clamp recordings from CA1 cells upon red-  
 63 light stimulation of axon terminals in CA1. Black lines show average response of 10 repetitions (grey  
 64 lines). **(f)** Quantification of experiment shown in (e) (black lines: medians, no error bars shown, n = 6  
 65 cells). The absence of somBiPOLES-mediated EPSCs upon local illumination in CA1, indicates efficient  
 66 exclusion of somBiPOLES from the axon terminals, despite strong membrane expression in the  
 67 somatodendritic compartment, which was evident from large EPSCs upon local illumination in CA3. The  
 68 data presented in this figure are provided in the Source Data file.

69  
70

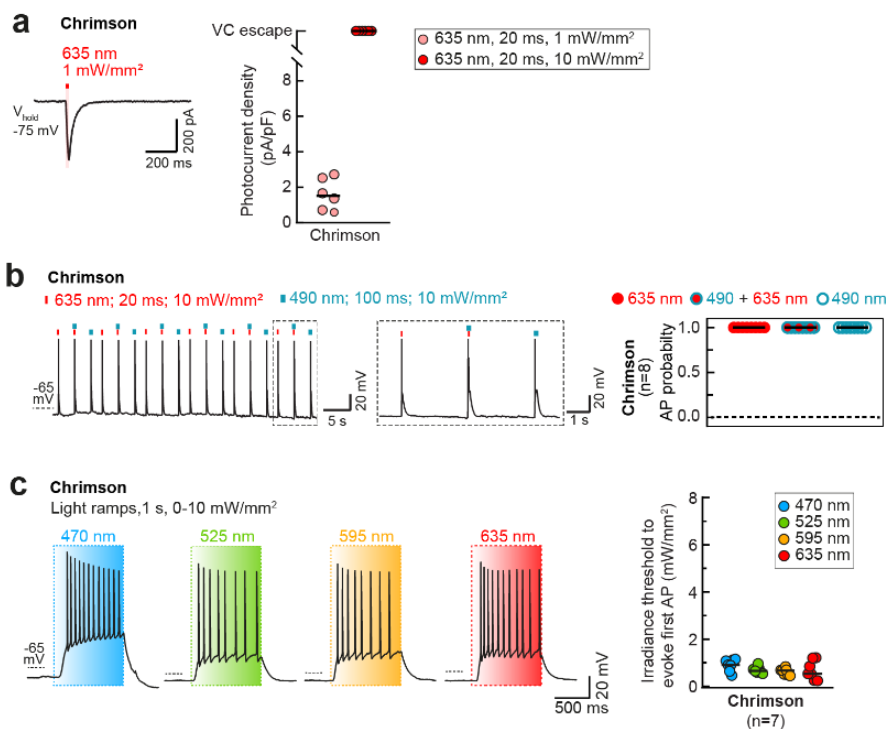

71

72 **Supplementary Fig. 4. Characterization of Chrimson-mediated currents and spiking in CA1**  
 73 **pyramidal cells. (a)** Left: Representative photocurrent trace evoked by a 635 nm light pulse (20 ms, 1  
 74 mW mm<sup>-2</sup>) recorded in a Chrimson-expressing CA1 pyramidal neuron at a membrane voltage of -75  
 75 mV. Right: Quantification of photocurrent densities evoked under the indicated conditions (black  
 76 horizontal lines: medians, n = 6 cells). **(b)** Left: Voltage traces showing red- and blue-light-evoked APs.  
 77 Right: Quantification of AP probability under indicated conditions (black horizontal lines: medians, n = 8  
 78 cells). Note that blue light does not elicit APs in somBiPOLES-expressing cells due to GtACR2-mediated  
 79 shunting (see Fig. 4b). **(c)** Spectral quantification of the irradiance threshold for AP generation with  
 80 Chrimson. Left: Representative membrane voltage traces during light ramps at indicated wavelengths  
 81 with irradiance increasing linearly from 0 to 10 mW mm<sup>-2</sup>. Right: Quantification of the irradiance threshold  
 82 at which the first AP was evoked (black horizontal lines: medians, n = 7 cells). Datasets for 470 and 595  
 83 nm are the same as shown in Fig. 3e. The data presented in this figure are provided in the Source Data  
 84 file.

85



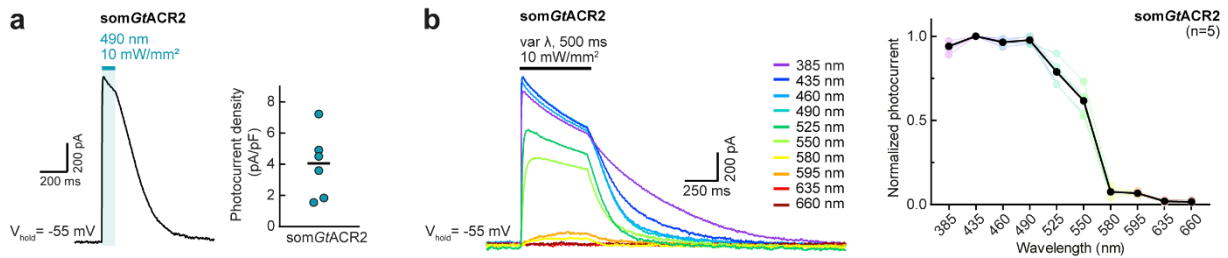

86

87 **Supplementary Fig. 5. Quantification of somGtACR2-mediated photocurrents in CA1 pyramidal**  
 88 **cells. (a)** Left: Representative photocurrent trace evoked by a 490 nm light pulse (100 ms, 10 mW mm<sup>-2</sup>)  
 89 recorded in a somGtACR2-expressing CA1 pyramidal neuron at -55 mV, 20 mV more positive than  
 90 the chloride Nernst potential. Right: Quantification of photocurrent densities evoked under the indicated  
 91 conditions (black horizontal lines: medians, n = 6 cells). **(b)** Left: Representative photocurrent traces  
 92 upon illumination with different wavelengths and equal photon flux at a membrane voltage of -55 mV.  
 93 Right: Normalized photocurrent amplitude along the spectrum (black circles: medians, n = 5 cells). The  
 94 data presented in this figure are provided in the Source Data file.

95

96

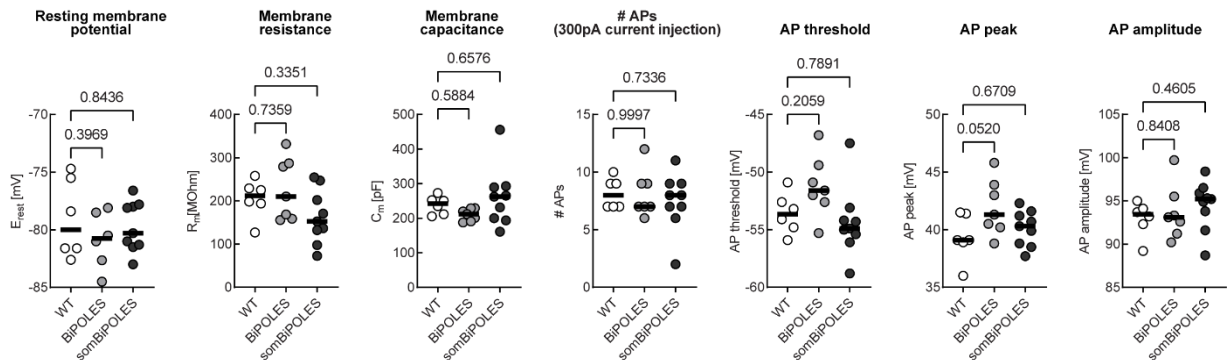

97

98 **Supplementary Fig. 6: Basic neuronal parameters of WT, BiPOLES- and somBiPOLES-**  
 99 **expressing CA1 pyramidal cells.** The following parameters were measured to assess cell viability and  
 100 tolerability of BiPOLES and somBiPOLES: resting membrane potential, membrane resistance,  
 101 membrane capacitance, number of APs evoked by somatic current injection (300 pA, 500 ms), voltage  
 102 threshold, peak voltage and AP amplitude of the 1<sup>st</sup> AP elicited by somatic current injection (black lines:  
 103 medians, WT n = 6 cells, BiPOLES n = 7 cells, somBiPOLES n = 9 cells, one-way ANOVA, exact P-  
 104 values are shown). The data presented in this figure and details on the statistical analysis are provided  
 105 in the Source Data file.

106

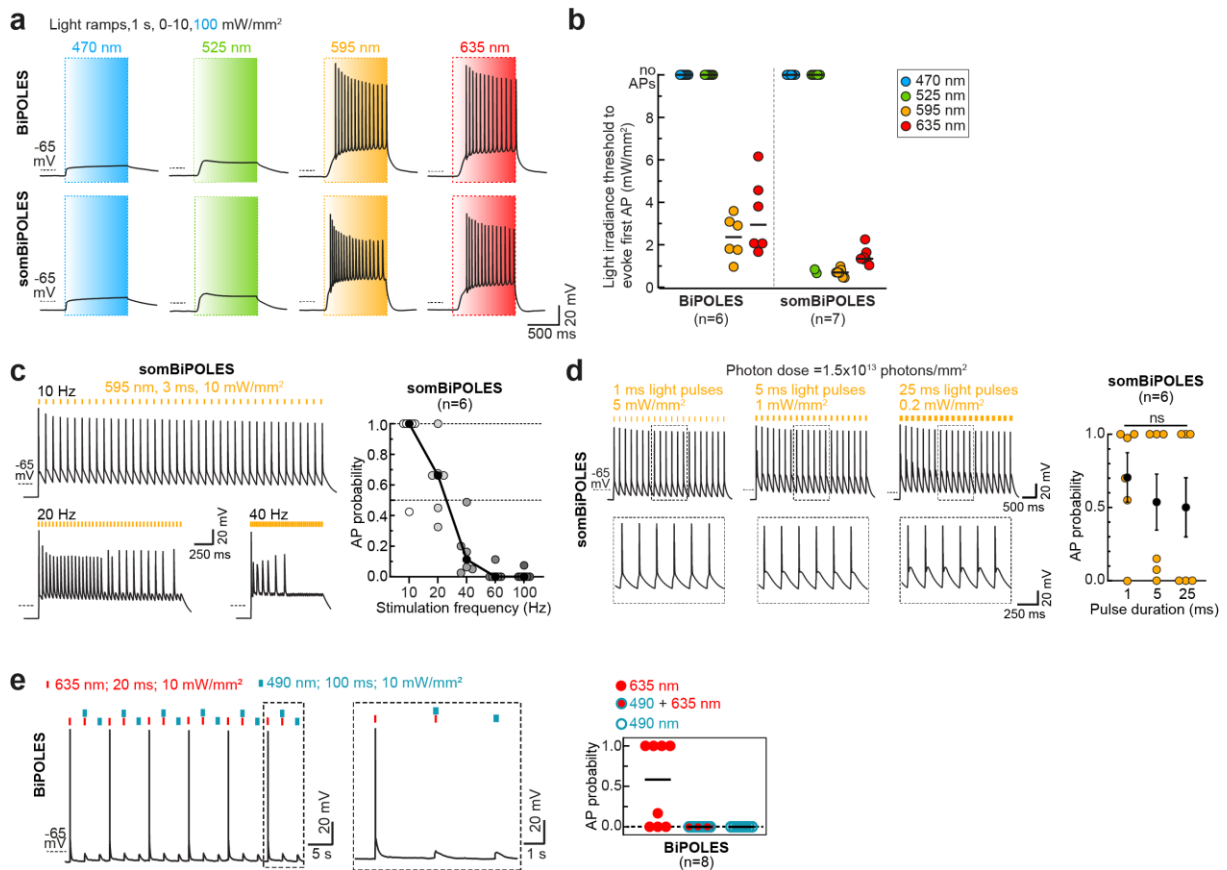

107

108 **Supplementary Fig. 7. Optical spiking parameters for BiPOLES and somBiPOLES.** (a,b) Spectral  
 109 quantification of action potential threshold for BiPOLES and somBiPOLES. (a) Representative  
 110 membrane voltage traces measured in BiPOLES- (top), or somBiPOLES-expressing CA1 pyramidal  
 111 neurons (bottom). In IC experiments, light ramps of different wavelengths were applied as indicated.  
 112 The irradiance was ramped linearly from 0 to 10 mW mm<sup>-2</sup> over 1 s, except for 470-nm ramps, which  
 113 were ranging to 100 mW mm<sup>-2</sup> to rule out the possibility that high-intensity blue light might still evoke  
 114 action potentials. (b) Quantification of the irradiance threshold at which the first action potential was  
 115 evoked. 470-nm light up to 100 mW mm<sup>-2</sup> did not evoke action potentials in BiPOLES or somBiPOLES-  
 116 expressing cells. The irradiance threshold for 595 and 635 nm illumination was lower in somBiPOLES-  
 117 expressing cells compared to BiPOLES-expressing cells indicating higher light sensitivity in the former  
 118 (black horizontal lines: medians, n<sub>BiPOLES</sub> = 6 cells, n<sub>somBiPOLES</sub> = 7 cells). somBiPOLES data for 470 and  
 119 595 nm are the same as in Fig. 3d. (c) Left: membrane voltage traces at different light-pulse frequencies  
 120 in CA1 cells expressing somBiPOLES. APs were triggered by 40 pulses ( $\lambda$  = 595 nm, pulse width = 3  
 121 ms, 10 mW mm<sup>-2</sup>). Right: Quantification of AP probability at increasing stimulation frequencies (from 10  
 122 to 100 Hz, black circles: medians, n = 6 cells). To determine AP probability, the number of light-triggered  
 123 APs was divided by the total number of light pulses. (d) Left: membrane voltage traces at different light-  
 124 pulse widths (1, 5 and 25 ms) and irradiances (5, 1, and 0.2 mW mm<sup>-2</sup>, respectively). In all conditions  
 125 the photon dose was kept constant at 1.5x10<sup>13</sup> photons/mm<sup>2</sup>. Magnified views of the traces are shown  
 126 below. Note the different shapes of the sub-threshold membrane voltages evoked by the respective  
 127 combination of parameters. Right: Quantification of AP probability at indicated light stimulation condition  
 128 (black circles: mean  $\pm$  SEM, n = 6 cells). (e) All-optical excitation and inhibition with BiPOLES. Current-  
 129 clamp characterization of bidirectional optical spiking-control with BiPOLES. Left: Voltage traces  
 130 showing red-light-evoked action potentials (APs), which were blocked by a concomitant blue light pulse.  
 131 Right: quantification of AP probability under indicated conditions (black horizontal lines: medians, n = 8  
 132 cells). The data presented in this figure and details on the statistical analysis are provided in the Source  
 133 Data file.

134

135

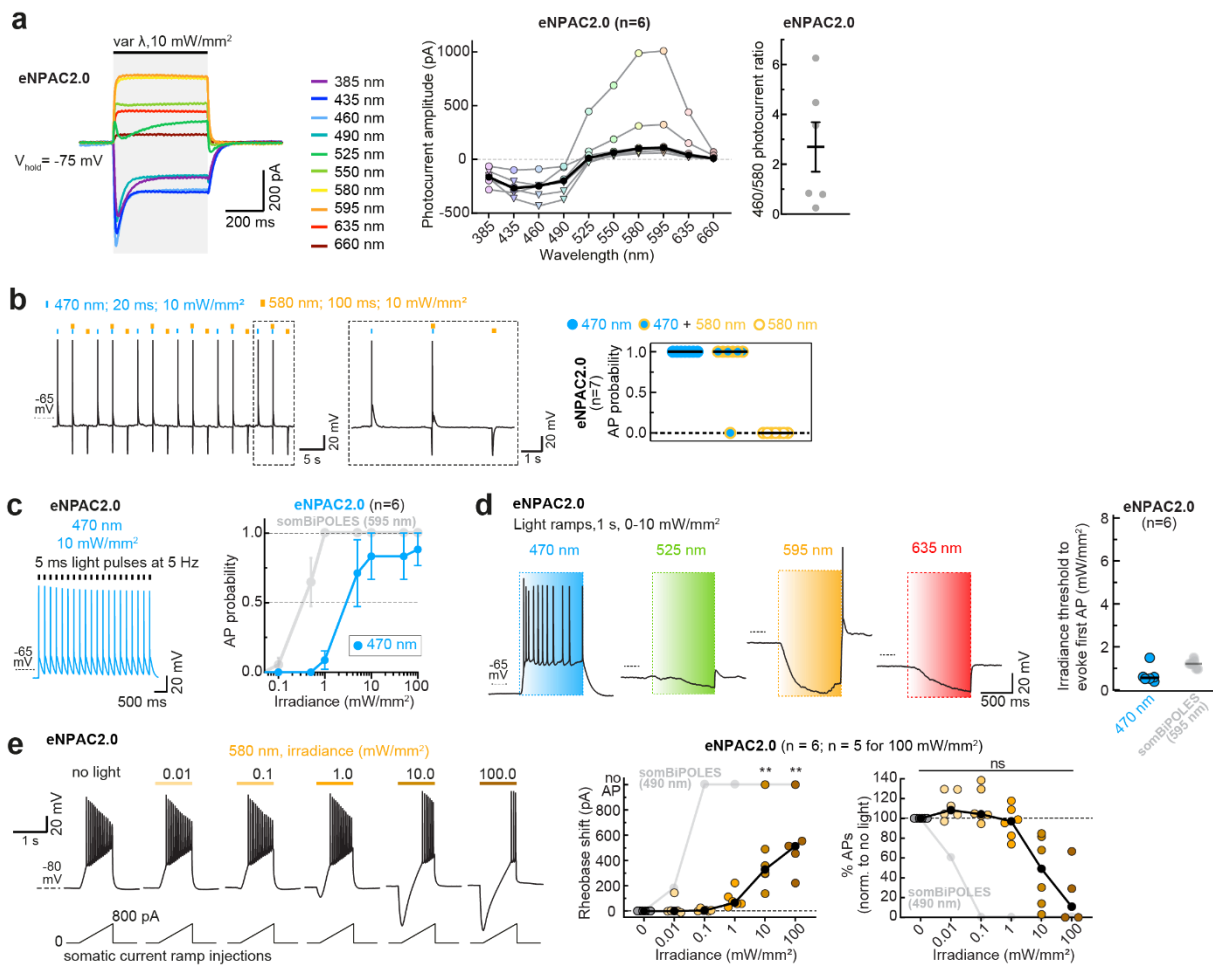

138 **Supplementary Fig. 8. Characterization of bidirectional optogenetic manipulation of neuronal**  
 139 **activity with eNPAC2.0.** (a) Left: Representative eNPAC2.0 photocurrent traces in CA1 pyramidal  
 140 neurons upon illumination with different wavelengths and equal photon flux at a membrane voltage of -  
 141 75 mV. Middle: Quantification of photocurrent amplitude along the spectrum (black circles: medians,  
 142 colored circles: photocurrents elicited by an irradiance of 10 mW mm<sup>-2</sup>, colored triangles: photocurrents  
 143 elicited by an irradiance of 1 mW mm<sup>-2</sup>, n = 6 cells). Similar to HEK-cell measurements (see  
 144 Supplementary Fig. 2b), inward and outward photocurrents were evoked with blue and orange light,  
 145 respectively, indicative of independently evoked ChR2(H134R)- and eNpHR3.0-photocurrents. Right:  
 146 Quantification of the ratio of excitatory (460 nm) over inhibitory (580 nm) photocurrents (black line: mean  
 147  $\pm$  SEM, n = 6 cells). Note that this ratio is more scattered compared to BiPOLES (see Supplementary  
 148 Fig. 3c), indicating variability in the stoichiometry of excitatory and inhibitory opsins between cells. This  
 149 is likely explained by the different expression strategies for eNPAC2.0 (bi-cistronic, p2A construct) and  
 150 BiPOLES (fusion protein and 1:1 stoichiometric expression of both tandem partners). (b)  
 151 Characterization of all-optical spiking and silencing with eNPAC2.0. Left: Voltage traces showing blue-  
 152 light-evoked APs, which, under the indicated conditions, could not be blocked by stimulation of  
 153 eNpHR3.0 with a concomitant yellow light pulse. Yellow light alone led to a hyperpolarization of  
 154 membrane voltage, indicating chloride loading of the cell by eNpHR3.0. Right: quantification of AP  
 155 probability under indicated conditions (black horizontal lines: medians, n = 7 cells). (c) Left: Example  
 156 traces of voltage clamp recordings of eNPAC2.0 to determine light-evoked AP probability with 470 nm.  
 157 Right: quantification of light-mediated AP probability at indicated irradiances (symbols represent mean  
 158  $\pm$  SEM, n = 6 cells). Note that even at an irradiance of 100 mW mm<sup>-2</sup> not all cells achieved 100% spiking  
 159 probability. This contrasts with CA1 cells expressing somBiPOLES or Chrimson alone, where 100%  
 160 spiking probability is achieved with 595-nm light (their peak activation wavelength) at irradiances around  
 161 1 mW mm<sup>-2</sup> (see Fig. 3b,c). (d) Spectral quantification of the irradiance threshold for AP generation with



162 eNPAC2.0. Left: Representative membrane voltage traces during light ramps at indicated wavelengths  
 163 with irradiance increasing linearly from 0 to 10 mW mm<sup>-2</sup>. Note that a rebound spike was triggered after  
 164 applying a 595-nm light ramp. Right: Quantification of the irradiance threshold at which the first AP was  
 165 evoked (black horizontal lines: medians, n = 6 cells). (e) eNPAC2.0 mediates neuronal membrane  
 166 voltage hyperpolarization upon illumination with yellow light. Left: Current ramps (from 0–100 to 0–900  
 167 pA) were injected into eNPAC2.0-expressing CA1 pyramidal cells to induce APs during illumination with  
 168 yellow light at indicated intensities (from 0.01 to 100 mW mm<sup>-2</sup>). Right: Quantification of the rheobase  
 169 shift and the relative change in the number of ramp-evoked action potentials. The injected current at the  
 170 time of the first action potential was defined as the rheobase. Illumination with 580 nm light of increasing  
 171 intensities activated eNpHR3.0-mediated Cl<sup>-</sup> pumping, which strongly hyperpolarized the membrane  
 172 voltage, shifting the rheobase to higher values and shunting APs. Note that the ability of eNPAC2.0 to  
 173 silence neurons is smaller compared to somBiPOLES (see Fig. 3g). eNPAC2.0 required 2 orders of  
 174 magnitude higher irradiance to achieve a significant shift of the rheobase (black circles: medians, n = 6,  
 175 one-way Friedman test, \*p < 0.05, \*\*p < 0.01, \*\*\*p < 0.001). Grey symbols and lines in (c), (d) and (e)  
 176 are somBiPOLES values from Fig. 3 plotted for comparison. The data presented in this figure and details  
 177 on the statistical analysis are provided in the Source Data file.

178

179

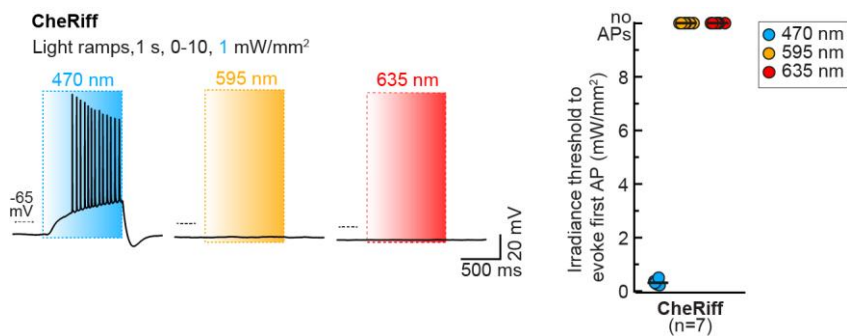

180

181 **Supplementary Fig. 9. CheRiff exhibits optical excitation restricted to the blue spectrum. (a)** Left:  
 182 Representative membrane voltage traces measured in CheRiff-expressing CA1 pyramidal neurons. In  
 183 IC experiments, light ramps of different wavelengths were applied as indicated. Light was ramped  
 184 linearly from 0 to 10 mW mm<sup>-2</sup> over 1 s. 470-nm ramps were ranging only up to 1 mW mm<sup>-2</sup>, which was  
 185 already sufficient to evoke APs. Right: Quantification of the irradiance threshold at which the first AP  
 186 was evoked. Orange/red light up to 10 mW mm<sup>-2</sup> did not evoke action potentials in CheRiff-expressing  
 187 cells (black horizontal lines: medians, n = 7 cells). The data presented in this figure are provided in the  
 188 Source Data file.

189

190

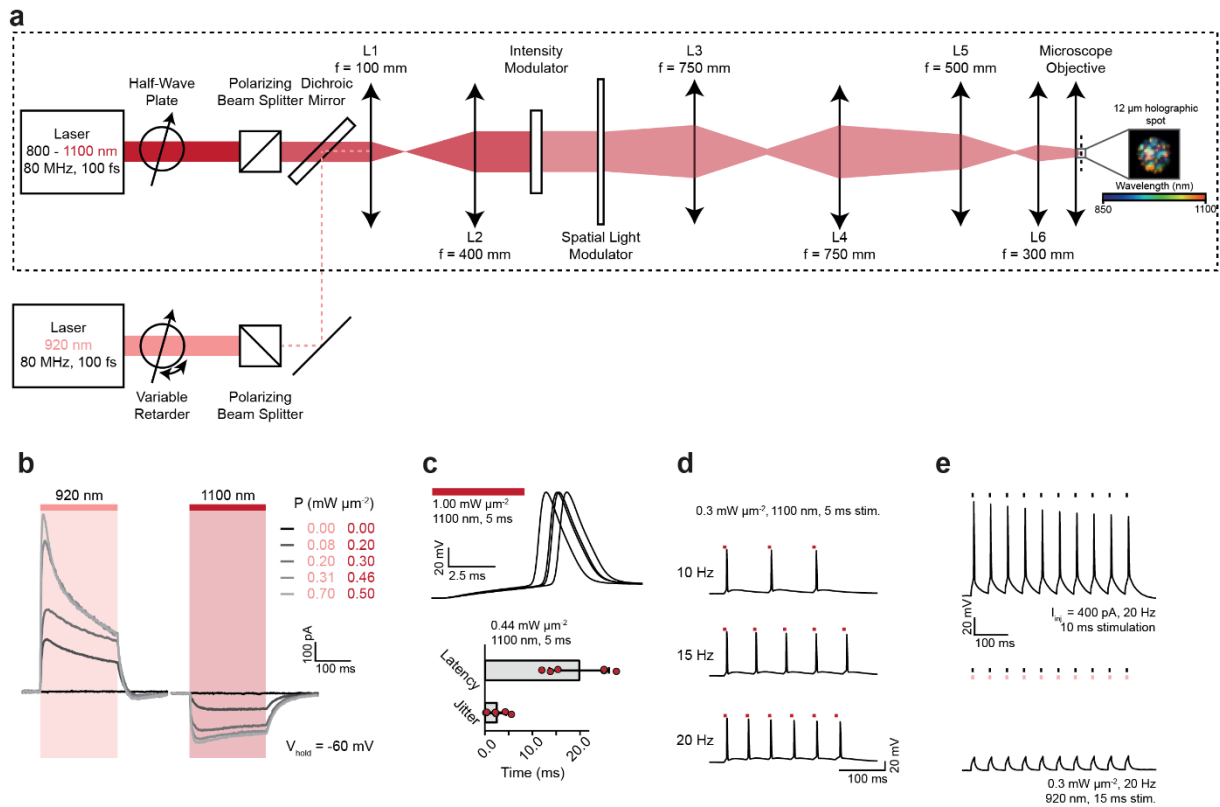

191

192 **Supplementary Fig. 10. Design of the dual-laser 2-photon holography setup. (a)** A schematic  
 193 diagram of the experimental setup used for two-photon photo-stimulation and inhibition using  
 194 holography. The optical path indicated by the black, dashed rectangle was used to acquire all data  
 195 presented in Fig. 5. The system was aligned at the central wavelength (980 nm), but holograms at all  
 196 wavelengths were co-aligned laterally and axially as demonstrated in the inset. Double-headed arrows  
 197 are used to illustrate lenses, denoted by L, with focal lengths denoted by f. The reflective Spatial Light  
 198 Modulator (SLM) is shown as transmissive for illustrative purposes. The photoinhibition beam (920 nm)  
 199 was combined with the beam from the tunable laser using a dichroic mirror. The precise details of each  
 200 optical component can be found in the main text. **(b)** Representative photocurrent traces at a range of  
 201 different average power densities, obtained by continuous 200 ms illumination of 920 and 1100 nm at a  
 202 holding potential of -60 mV. **(c)** Top: Representative traces of photo-evoked action potentials. Bottom:  
 203 Mean latency and jitter calculated as the average of 5 trials in different neurons. Error bars represent  
 204 the standard deviation across trials. **(d)** Representative photo evoked trains of action potentials under  
 205 1100-nm illumination at different stimulation frequencies. **(e)** Demonstration of precise elimination of  
 206 single action potentials using short (15 ms) pulses of 920 nm light. Upper trace (control): electrically  
 207 induced 20 Hz spike train by 10 ms injection of 400 pA current. Lower trace: suppression of electrically  
 208 induced action potentials by co-incident illumination of 15 ms pulses of 920 nm light. The data presented  
 209 in this figure are provided in the Source Data file.

210

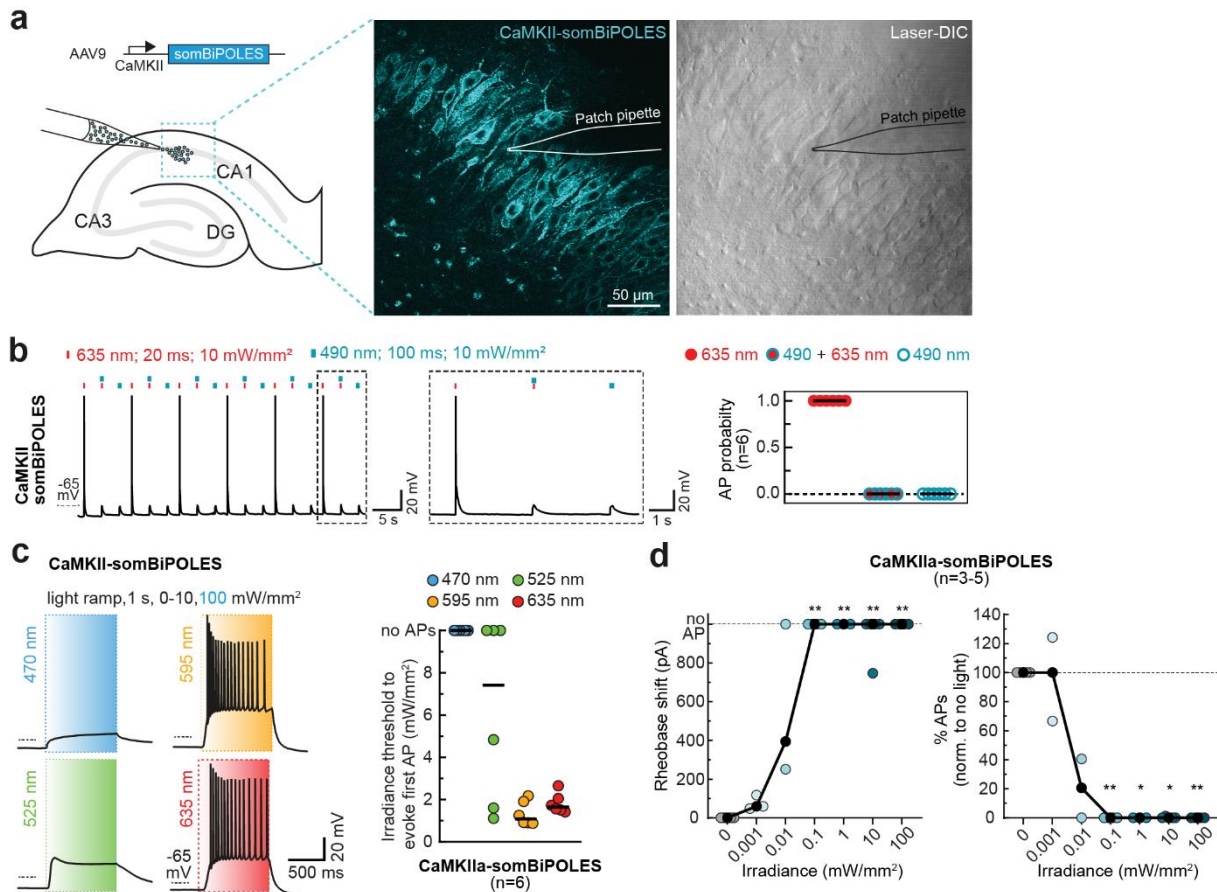

211

212 **Supplementary Fig. 11. Virally expressed CaMKII-somBiPOLES enables bidirectional control of**  
 213 **activity in projection neurons. (a)** Viral transduction of CaMKII-somBiPOLES in hippocampal  
 214 organotypic slice cultures. Right: Single-plane 2-photon fluorescence (cyan) and laser-DIC (gray)  
 215 example images showing expression of somBiPOLES in pyramidal cells of *stratum pyramidale* and  
 216 cellular morphology, respectively. The position of the patch pipette is depicted by a drawing of its outline.  
 217 **(b)** IC characterization of bidirectional optical spiking-control with CaMKII-somBiPOLES. Left: Voltage  
 218 traces showing red-light-evoked APs, which were blocked by a concomitant blue-light pulse. Blue light  
 219 alone did not trigger APs. Right: quantification of AP probability under indicated conditions (black  
 220 horizontal lines: medians, n = 6 cells). **(c)** Left: Representative membrane voltage traces measured in  
 221 CaMKII-somBiPOLES-expressing pyramidal neurons. In IC experiments, light ramps were applied as  
 222 indicated. Light was ramped linearly from 0 to 10 mW mm<sup>-2</sup> over 1 s, except for 470 nm ramps, which  
 223 were ranging to 100 mW mm<sup>-2</sup> to rule out the possibility that high-irradiance blue light might still evoke  
 224 APs. Right: Quantification of the irradiance threshold at which the first AP was evoked (black horizontal  
 225 lines: medians, n = 6 cells). **(d)** Quantification of CaMKII-somBiPOLES-mediated neuronal silencing.  
 226 Current ramps (from 0–100 to 0–900 pA) were injected into CaMKII-somBiPOLES-expressing cells to  
 227 induce APs. The injected current at the time of the first AP was defined as the rheobase. Illumination  
 228 with blue light of increasing irradiance (from 0.001 to 100 mW mm<sup>-2</sup>) activated *GtACR2*-mediated  
 229 Cl<sup>-</sup> currents shifting the rheobase to higher values (black circles: medians, n = 5 cells (in 3 cells rheobase  
 230 shift and %APs were measured for all light irradiances, in 1 cell for 0.0 0.1, 10 and 100 mW mm<sup>-2</sup>; and  
 231 in 1 cell only for 0.0 and 0.1 mW mm<sup>-2</sup>), one-way Kruskal-Wallis test, \*\*p < 0.01, \*\*\*p < 0.001). The data  
 232 presented in this figure and details on the statistical analysis are provided in the Source Data file.

233

234

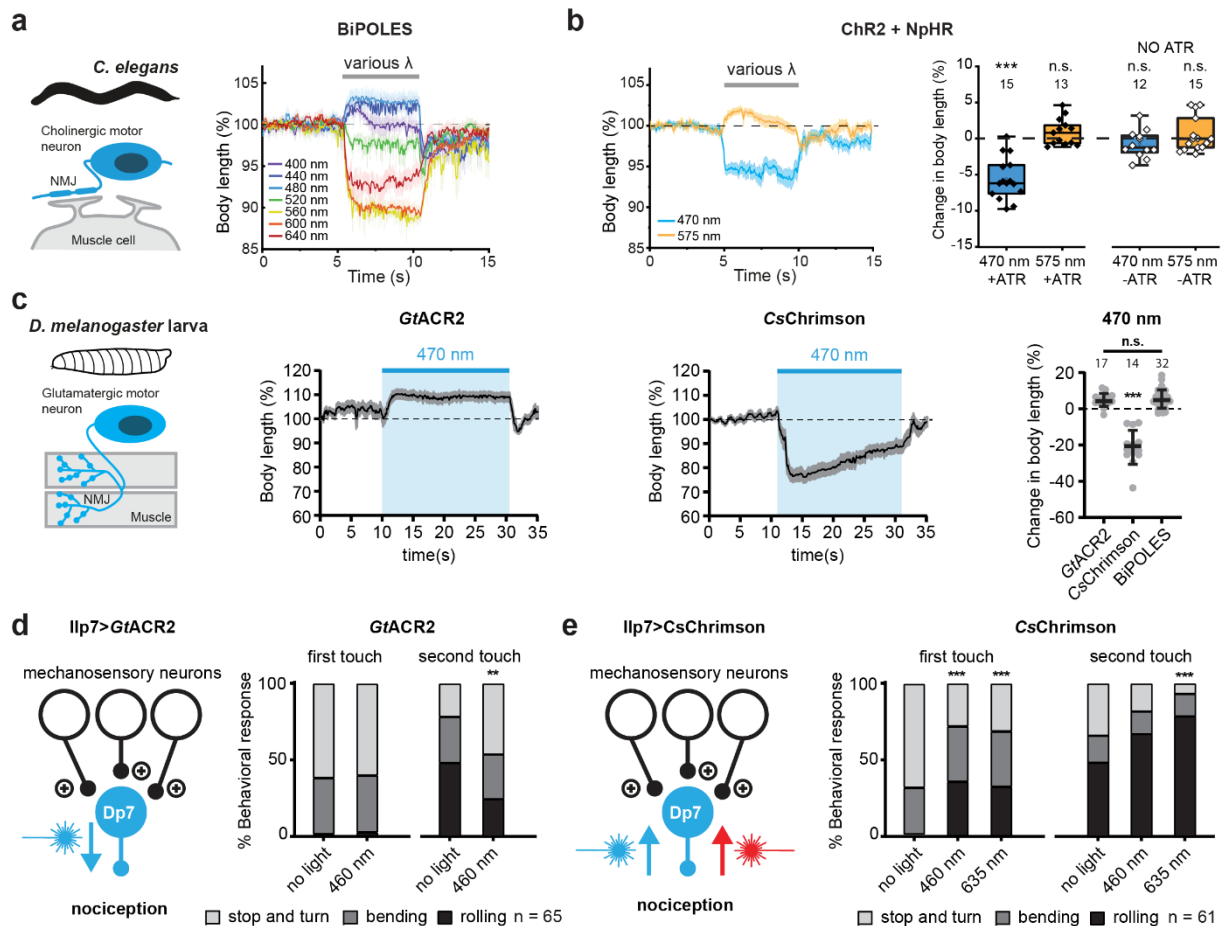

235

236

237

238

239

240

241

242

243

244

245

246

247

248

249

250

251

252

253

254

255

256

257

258

259

260

261

262

**Supplementary Fig. 12. BiPOLES and controls in *C. elegans* and *D. melanogaster*.** (a) Precise timing of bidirectional control of cholinergic motor neurons in *C. elegans*. Temporal dynamics of relative changes in body length upon illumination with light at wavelengths ranging from 400 to 640 nm in *C. elegans* expressing BiPOLES in cholinergic motor neurons (mean  $\pm$  SEM, 1.1 mW mm<sup>-2</sup>, 400 nm, n = 9; 440 nm, n = 12; 480 nm, n = 10; 520 nm, n = 12; 560 nm, n = 9; 600 nm, n = 13; 640 nm, n = 11). (b) Left: temporal dynamics of relative changes in body length upon illumination with light at 470 and 575 nm in *C. elegans* expressing ChR2(HR) and NpHR in cholinergic motor neurons (mean  $\pm$  SEM, 1.1 mW mm<sup>-2</sup>, 400 nm, n = 9; 440 nm, n = 12; 480 nm, n = 10; 520 nm, n = 12; 560 nm, n = 9; 600 nm, n = 13; 640 nm, n = 11). Right: quantification of maximal change in body length (Box: median, 1st – 3rd quartile, whiskers: 1.5x inter quartile range, \*\*\*p < 0.0001, paired, two-sided t-test, p values of comparisons of the stimulated condition (seconds 6-9 against the non-stimulated condition (seconds 0-4): 470 nm with ATR (n = 15): 6.4E-8, 575 nm with ATR (n = 13): 0.11, 470 nm without ATR (n = 12): 0.21, 575 nm without ATR (n = 15): 0.73). Note that NpHR stimulation did not lead to significant body relaxation. (c) GtACR2 or CsChrimson expressed alone in glutamatergic neurons of *D. melanogaster* larvae (*OK371-Gal4>UAS-GtACR2* or *UAS-CsChrimson*) result in opposite responses upon blue light stimulation. Schematic of GtACR2- or CsChrimson-expressing glutamatergic motor neuron innervating muscle fibers. Middle: Temporal dynamics of relative changes in body length upon illumination with 470 nm light (mean  $\pm$  SEM, 17  $\mu$ W/mm<sup>2</sup>, n = 32). Right: Quantification of maximal change in body length (mean  $\pm$  SEM, GtACR2, n = 17; CsChrimson, n = 14; BiPOLES, n = 32, \*\*\*p < 0.0001). Note that similar to BiPOLES, blue light illumination of animals expressing GtACR2 alone leads to body relaxation (BiPOLES dataset from Fig. 6d). In contrast, CsChrimson alone induces body constriction under blue light. (d) GtACR2 expression in Dp7 neurons in *Drosophila* larvae (*Ilp7-Gal4>UAS-GtACR2*) and behavioral response after the first and second mechanical stimulus under blue light (470 nm) compared to no light shows comparable inhibition of rolling as BiPOLES. n = 60 \*\*p = 0.0057, X<sup>2</sup>-test. (e) CsChrimson expression in Dp7 neurons (*Ilp7-Gal4>UAS-CsChrimson*) and behavioral response after the first and second mechanical stimulus under blue light (470 nm, 1.7  $\mu$ W mm<sup>-2</sup>) or red light (635 nm, 2.5  $\mu$ W/mm<sup>2</sup>) illumination compared to no light. Note that unlike with BiPOLES, blue light and red light

263 increased rolling responses with CsChrimson.  $n = 61$ ,  $***p < 0.0001$ ,  $X^2$ -test. The data presented in this  
264 figure and details on the statistical analysis are provided in the Source Data file.

265

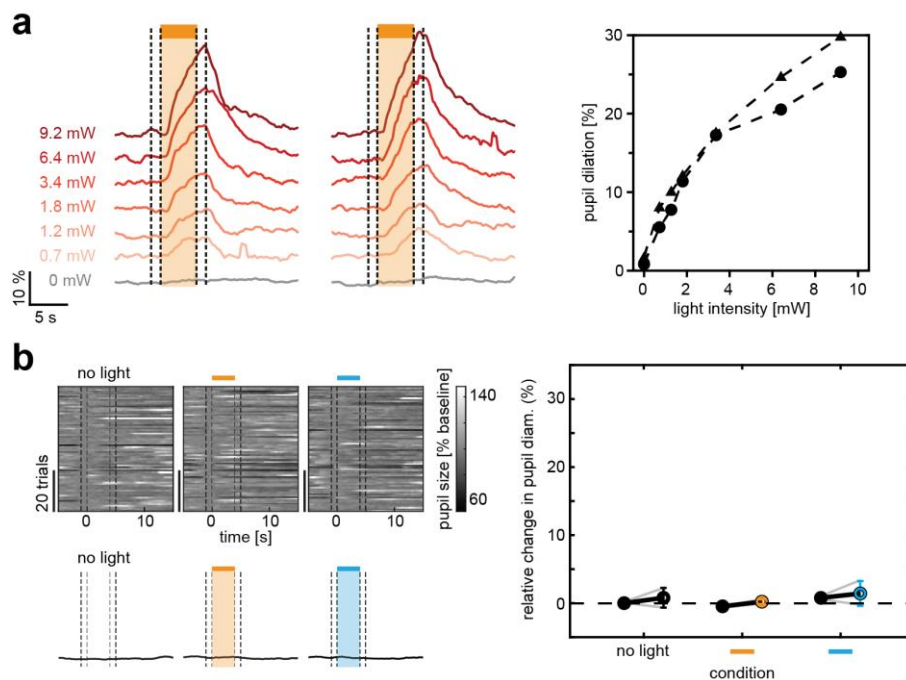

266

267 **Supplementary Fig. 13. somBiPOLES controls in LC neurons. (a)** The magnitude of pupil dilation  
268 scales with the red-light irradiance. Quantification of normalized pupil size in two animals under indicated  
269 light powers per fiber (594 nm). Dashed lines show regions used for quantification in the plot on the  
270 right. **(b)** Pupil dilation is not altered by light applied to the LC in fiber-implanted, non-injected wild-type  
271 animals. Quantification of normalized pupil size in one wild-type animal under various stimulation  
272 conditions as indicated. Orange and blue bars indicate time of illumination with 594 (orange) and 473  
273 nm (blue), respectively. Top left: single trials. Bottom left: mean  $\pm$  SEM. Dashed lines show time points  
274 used for quantification in the plot on the right. Right: quantification of relative pupil size ( $n = 3$  mice; One-  
275 way analysis of variance;  $F = 0.01$ ,  $p = 0.99$ ). The data presented in this figure and details on the  
276 statistical analysis are provided in the Source Data file.

277



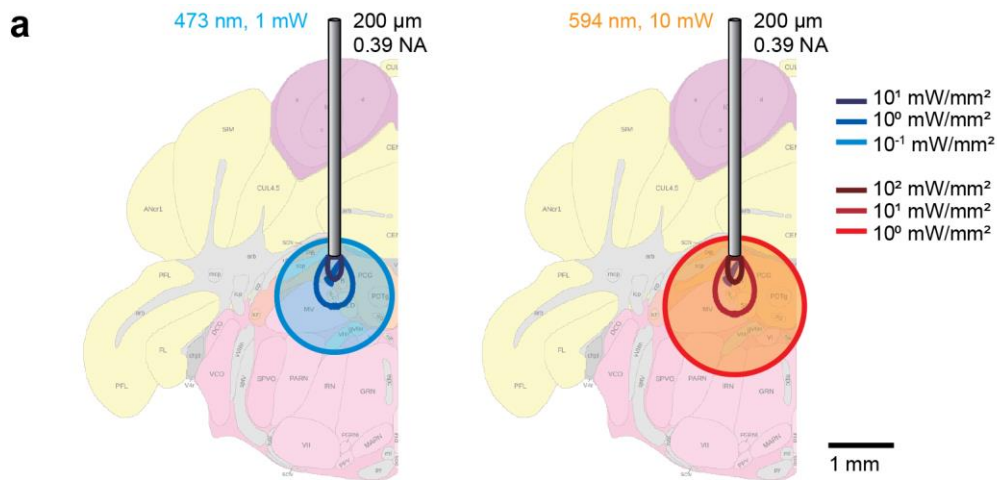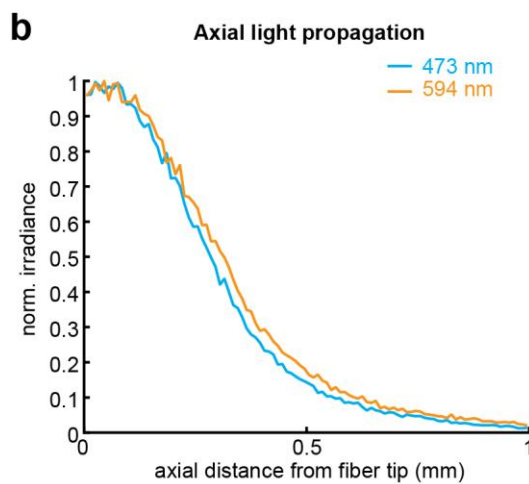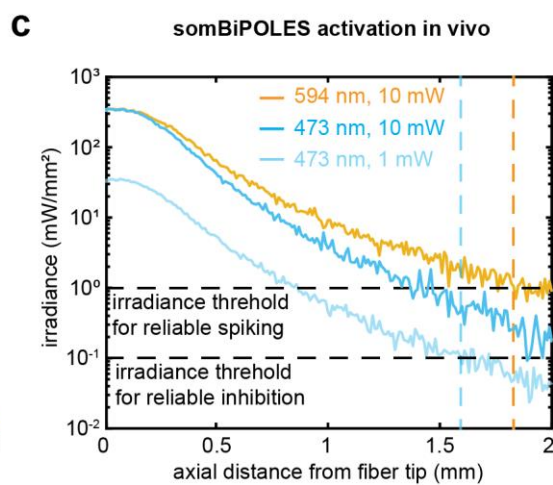

278

279 **Supplementary Fig. 14. Monte-Carlo simulation of light propagation in the mouse brain to**  
 280 **estimate somBiPOLES performance in vivo. (a)** Simulation of light propagation (473 nm, left and 594  
 281 nm, right) from the tip of an optical fiber implanted above Locus Coeruleus in the mouse brain. Contour  
 282 lines indicate interval of one log unit. **(b)** Simulation of the axial irradiance perpendicular to the fiber tip.  
 283 Note the minimal differences in attenuation of blue light vs. orange light. **(c)** Estimation of reliable  
 284 somBiPOLES performance under indicated light conditions. Reliable spiking of neurons can be achieved  
 285 up to ~1.8 mm away from the fiber tip with 10 mW of 594 nm light. Similarly, efficient shunting of neuronal  
 286 activity is achieved up to ~1.6 mm from the fiber tip with 1 mW of 473 nm light. The blue and orange  
 287 irradiance thresholds required for reliable silencing and spiking are derived from Fig. 3. The data  
 288 presented in this figure are provided in the Source Data file.

289

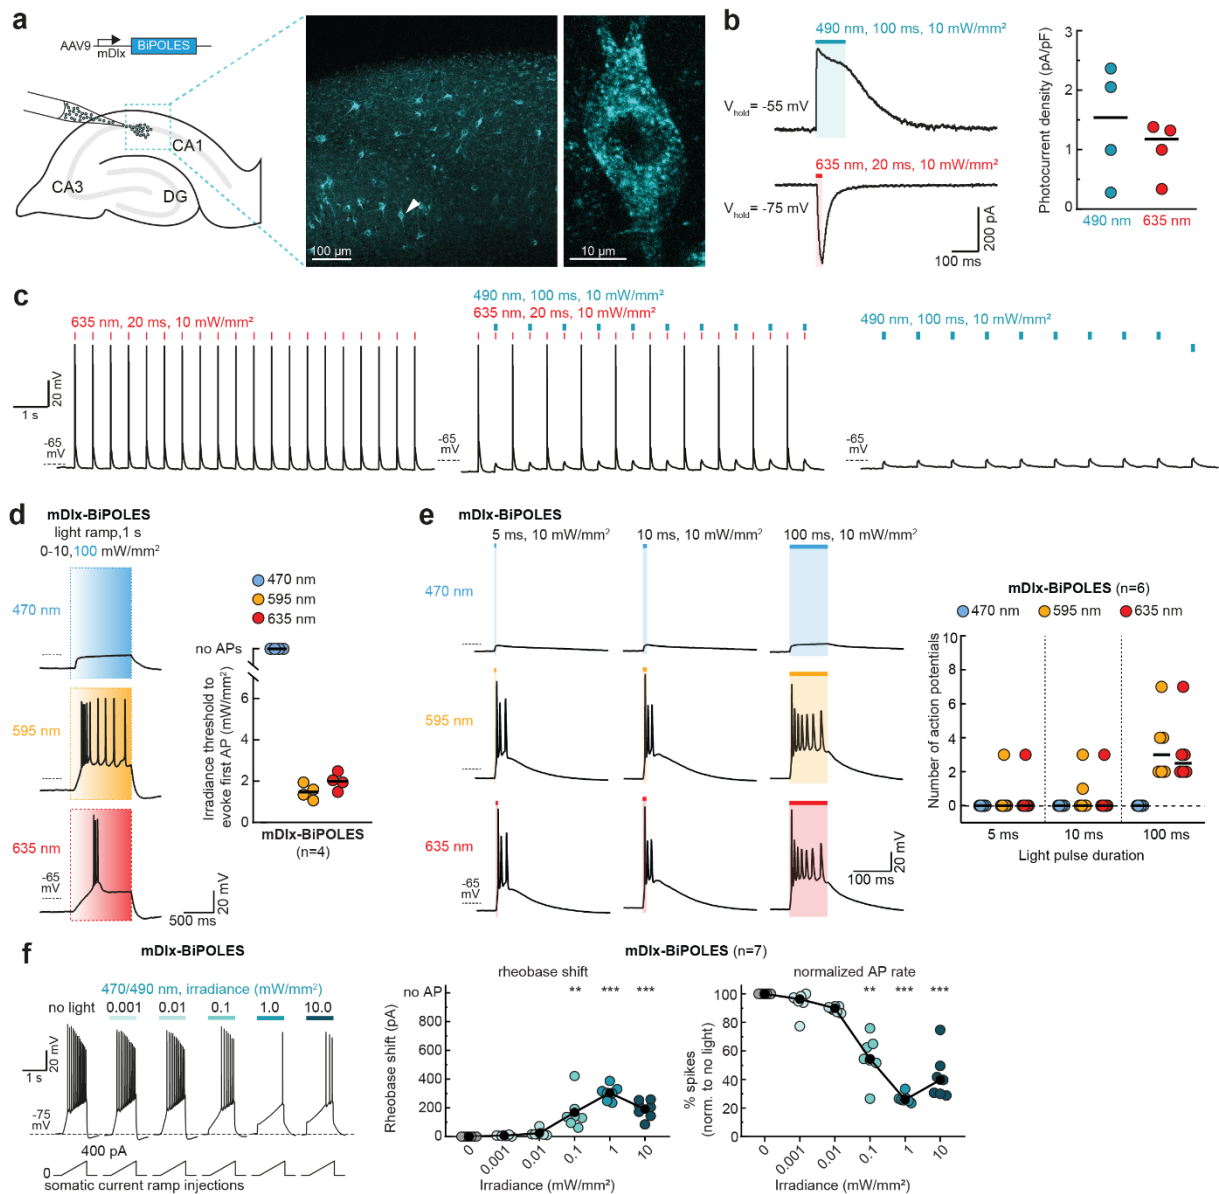

290

291 **Supplementary Fig. 15. Virally expressed mDlx-BiPOLES enables bidirectional control of**  
 292 **GABAergic neuronal activity.** (a) Viral transduction of mDlx-BiPOLES in hippocampal organotypic  
 293 slice cultures. Right: Representative maximum-intensity projection image of a 2-photon stack showing  
 294 expression of BiPOLES in GABAergic neurons in CA1. Magnified view of a single neuron indicated by  
 295 white arrowhead is shown on the right. (b) Left: Representative photocurrent traces measured in an  
 296 mDlx-BiPOLES-expressing CA1 GABAergic neuron. Photocurrents evoked by a 490 nm light pulse (100  
 297 ms, 10 mW mm<sup>-2</sup>) were recorded at a membrane voltage of -55 mV and photocurrents evoked by a 635  
 298 nm light pulse (20 ms, 10 mW mm<sup>-2</sup>) were recorded at a membrane voltage of -75 mV. Right:  
 299 Quantification of photocurrent densities evoked under the indicated conditions (black horizontal lines:  
 300 medians, n = 4 cells). (c) IC characterization of bidirectional optical spiking-control with mDlx-BiPOLES.  
 301 Voltage traces showing red-light-evoked APs (left), which were blocked by a concomitant blue-light  
 302 pulse (middle). Blue light alone did not trigger APs (right). (d) Left: Representative IC membrane voltage  
 303 traces measured in mDlx-BiPOLES-expressing neurons. In IC experiments, light ramps were applied as  
 304 indicated. Irradiance was ramped linearly over 1 s from 0 to 10 mW mm<sup>-2</sup> or to 100 mW mm<sup>-2</sup> for 470  
 305 nm to rule out the possibility that high-irradiance blue light might still evoke action potentials. Right:  
 306 Quantification of the irradiance threshold at which the first AP was evoked (black horizontal lines:  
 307 medians, n = 4 cells) 470-nm light up to 100 mW mm<sup>-2</sup> did not evoke APs in mDlx-BiPOLES-expressing  
 308 cells, while 595 and 635 nm light evoked APs at irradiance levels comparable to pyramidal cells  
 309 expressing BiPOLES (see Supplementary Fig. 7a,b). (e) Extended duration of illumination increased the

310 probability and number of action potentials. Left: Representative IC membrane voltage traces measured  
311 in mDlx-BiPOLES-expressing neurons illuminated as indicated. Right: quantification of the number of  
312 action potentials evoked by the different illumination protocols (black horizontal lines: medians, n = 6  
313 cells). **(f)** Quantification of mDlx-BiPOLES-mediated neuronal silencing. Current ramps (from 0–100 to  
314 0–900 pA) were injected into mDlx-BiPOLES-expressing cells to induce action potentials. The injected  
315 current at the time of the first action potential was defined as the rheobase. Illumination with blue light  
316 of increasing irradiance (from 0.001 to 10.0 mW mm<sup>-2</sup>) activated *GtACR2*-mediated Cl<sup>-</sup> currents shifting  
317 the rheobase to higher values. Middle: Quantification of the rheobase shift at different light intensities.  
318 Right: Relative change in the number of ramp-evoked action potentials upon illumination with blue light  
319 at indicated irradiance values (black circles: medians, n = 7 cells, one-way Friedman test, \*\*p < 0.01,  
320 \*\*\*p < 0.001). The data presented in this figure and details on the statistical analysis are provided in the  
321 Source Data file.

322
