# Supplementary material for: BiPOLES is an optogenetic tool developed for bidirectional dual-color control of neurons
Source: Springer Nature journal article supplement (doi:10.1038/s41467-021-24759-5), 2021-07-26
Supplement: MOESM5 [file 41467_2021_24759_MOESM5_ESM.pdf]

**Title:** Supplementary Data 1

**Description:** This document contains the nucleotide sequences encoding the various genes and constructs that were generated and used in this study. It also contains a list of primers used for cloning of new DNA constructs
