# Supplementary material for: BiPOLES is an optogenetic tool developed for bidirectional dual-color control of neurons
Source: Nat Commun. 2021 Jul 26;12:4527. doi: 10.1038/s41467-021-24759-5 (PMC8313717; doi:10.1038/s41467-021-24759-5)
Supplement: Supplementary file 4 — Supplementary Data 1 [file 41467_2021_24759_MOESM4_ESM.xlsx]

## Sheet: iC++-L1-Chrimson (HEK cells)
Name	iC++-L1-Chrimson (HEK cells)
Sequence	ATGGACTATGGCGGCGCTTTGTCTGCCGTCGGACTCTTCCAAACCTCATACACTCTTGAGAACAATGGTTCTGTTATTTGCATCCCGAACAACGGCCAGTGCTTCTGCTTGGCTTGGCTTAAATCCAACGGAACAAATGCCGAGAAGTTGGCTGCCAACATTCTGCAGTGGATTTCTTTTGCGCTTTCAGCGCTCTGCCTGATGTTCTACGGCTACCAGACCTGGAAGTCTACTTGCGGCTGGGAGAACATTTACGTGGCCACGATCCAGATGATCAAGTTCATCATCGAGTATTTCCATAGCTTTGACGAACCTGCGGTGATCTACTCATCCAACGGCAACAAGACCCGGTGGCTTCGTTACGCGAGCTGGCTGCTGACCTGCCCTGTCATTCTTATC…
Annotations	iC++:	1..927			1 ATGGACTATG GCGGCGCTTT GTCTGCCGTC GGACTCTTCC AAACCTCATA CACTCTTGAG
	ts:	940..999			61 AACAATGGTT CTGTTATTTG CATCCCGAAC AACGGCCAGT GCTTCTGCTT GGCTTGGCTT
	eYFP:	1024..1734			121 AAATCCAACG GAACAAATGC CGAGAAGTTG GCTGCCAACA TTCTGCAGTG GATTTCTTTT
	ßHK:	1735..2046			181 GCGCTTTCAG CGCTCTGCCT GATGTTCTAC GGCTACCAGA CCTGGAAGTC TACTTGCGGC
	Chrimson:	2089..3132			241 TGGGAGAACA TTTACGTGGC CACGATCCAG ATGATCAAGT TCATCATCGA GTATTTCCAT
					301 AGCTTTGACG AACCTGCGGT GATCTACTCA TCCAACGGCA ACAAGACCCG GTGGCTTCGT
					361 TACGCGAGCT GGCTGCTGAC CTGCCCTGTC ATTCTTATCC ACCTGAGCAA CCTTACGGGT
					421 CTGGCGAACG ACTATAACAA GCGTACCATG GGTCTGCTGG TGTCAGATAT CGGCACGATC
					481 GTGTGGGGCA CCACGGCCGC GCTGTCCAAG GGATACGTCC GTGTCATTTT CTTCCTGATG
					541 GGCCTGTGCT ACGGCATCTA CACATTCTTC AACGCAGCCA AGGTCTACAT TGAGGCGTAC
					601 CACACCGTGC CGAAGGGCCG GTGTCGCCAG GTGGTGACTG GCATGGCTTG GCTCTTCTTC
					661 GTATCATGGG GTATGTTCCC CATCCTGTTC ATCCTCGGCC CCGAGGGCTT CGGCGTCCTG
					721 AGCCGGTACG GCTCCAACGT CGGCCACACC ATCATTGACC TGATGTCGAA GCAGTGCTGG
					781 GGTCTGCTCG GCCACTACCT GCGCGTGCTG ATCCACAGCC ATATCCTCAT CCACGGCGAC
					841 ATTCGCAAGA CCACCAAATT GAACATTGGT GGCACTGAGA TTGAGGTCGA GACGCTGGTG
					901 GAGGACGAGG CCGAGGCTGG CGCGGTCCGT ACGGCGGCCA AGAGCAGGAT CACCAGCGAG
					961 GGCGAGTACA TCCCCCTGGA CCAGATCGAC ATCAACGTGG CGGTACCCGC GGCCGCCACC
					1021 ATTGTGAGCA AGGGCGAGGA GCTGTTCACC GGGGTGGTGC CCATCCTGGT CGAGCTGGAC
					1081 GGCGACGTAA ACGGCCACAA GTTCAGCGTG TCCGGCGAGG GCGAGGGCGA TGCCACCTAC
					1141 GGCAAGCTGA CCCTGAAGTT CATCTGCACC ACCGGCAAGC TGCCCGTGCC CTGGCCCACC
					1201 CTCGTGACCA CCTTCGGCTA CGGCCTGCAG TGCTTCGCCC GCTACCCCGA CCACATGAAG
					1261 CAGCACGACT TCTTCAAGTC CGCCATGCCC GAAGGCTACG TCCAGGAGCG CACCATCTTC
					1321 TTCAAGGACG ACGGCAACTA CAAGACCCGC GCCGAGGTGA AGTTCGAGGG CGACACCCTG
					1381 GTGAACCGCA TCGAGCTGAA GGGCATCGAC TTCAAGGAGG ACGGCAACAT CCTGGGGCAC
					1441 AAGCTGGAGT ACAACTACAA CAGCCACAAC GTCTATATCA TGGCCGACAA GCAGAAGAAC
					1501 GGCATCAAGG TGAACTTCAA GATCCGCCAC AACATCGAGG ACGGCAGCGT GCAGCTCGCC
					1561 GACCACTACC AGCAGAACAC CCCCATCGGC GACGGCCCCG TGCTGCTGCC CGACAACCAC
					1621 TACCTGAGCT ACCAGTCCGC CCTGAGCAAA GACCCCAACG AGAAGCGCGA TCACATGGTC
					1681 CTGCTGGAGT TCGTGACCGC CGCCGGGATC ACTCTCGGCA TGGACGAGCT GTACGCAGCC
					1741 CTGCAGGAGA AGAAGTCATG CAGCCAGCGC ATGGCCGAAT TCCGGCAATA CTGTTGGAAC
					1801 CCGGACACTG GGCAGATGCT GGGCCGCACC CCAGCCCGGT GGGTGTGGAT CAGCCTGTAC
					1861 TATGCAGCTT TCTACGTGGT CATGACTGGG CTCTTTGCCT TGTGCATCTA TGTGCTGATG
					1921 CAGACCATTG ATCCCTACAC CCCCGACTAC CAGGACCAGT TAAAGTCACC GGGGGTAACC
					1981 TTGAGACCGG ATGTGTATGG GGAAAGAGGG CTGCAGATTT CCTACAACAT CTCTGAAAAC
					2041 AGCTCTAGAC AGGCCCAGAT CACCGGACGT CCGGAGGGAG CTGTACAAGA GCTGATCAGC
					2101 AGCGCCACCA GATCTCTGTT TGCCGCCGGA GGCATCAACC CTTGGCCTAA CCCCTACCAC
					2161 CACGAGGACA TGGGCTGTGG AGGAATGACA CCTACAGGCG AGTGCTTCAG CACCGAGTGG
					2221 TGGTGTGACC CTTCTTACGG ACTGAGCGAC GCCGGATACG GATATTGCTT CGTGGAGGCC
					2281 ACAGGCGGCT ACCTGGTCGT GGGAGTGGAG AAGAAGCAGG CTTGGCTGCA CAGCAGAGGC
					2341 ACACCAGGAG AAAAGATCGG CGCCCAGGTC TGCCAGTGGA TTGCTTTCAG CATCGCCATC
					2401 GCCCTGCTGA CATTCTACGG CTTCAGCGCC TGGAAGGCCA CTTGCGGTTG GGAGGAGGTC
					2461 TACGTCTGTT GCGTCGAGGT GCTGTTCGTG ACCCTGGAGA TCTTCAAGGA GTTCAGCAGC
					2521 CCCGCCACAG TGTACCTGTC TACCGGCAAC CACGCCTATT GCCTGCGCTA CTTCGAGTGG
					2581 CTGCTGTCTT GCCCCGTGAT CCTGATCAAG CTGAGCAACC TGAGCGGCCT GAAGAACGAC
					2641 TACAGCAAGC GGACCATGGG CCTGATCGTG TCTTGCGTGG GAATGATCGT GTTCGGCATG
					2701 GCCGCAGGAC TGGCTACCGA TTGGCTCAAG TGGCTGCTGT ATATCGTGTC TTGCATCTAC
					2761 GGCGGCTACA TGTACTTCCA GGCCGCCAAG TGCTACGTGG AAGCCAACCA CAGCGTGCCT
					2821 AAAGGCCATT GCCGCATGGT CGTGAAGCTG ATGGCCTACG CTTACTTCGC CTCTTGGGGC
					2881 AGCTACCCAA TCCTCTGGGC AGTGGGACCA GAAGGACTGC TGAAGCTGAG CCCTTACGCC
					2941 AACAGCATCG GCCACAGCAT CTGCGACATC ATCGCCAAGG AGTTTTGGAC CTTCCTGGCC
					3001 CACCACCTGA GGATCAAGAT CCACGAGCAC ATCCTGATCC ACGGCGACAT CCGGAAGACC
					3061 ACCAAGATGG AGATCGGAGG CGAGGAGGTG GAAGTGGAAG AGTTCGTGGA GGAGGAGGAC
					3121 GAGGACACAG TGTGA

## Sheet: Aurora-L1-Chrimson (HEK cells)
Name	Aurora-L1-Chrimson (HEK cells)
Sequence	ATGGATTACGGCGGAGCCCTGTCAGCAGTCGGCCTGTTTCAGACCTCATATACCCTGGAGAATAACGGCAGCGTCATCTGTATCCCAAATAACGGGCAGTGTTTCTGCCTGGCATGGCTGAAGAGCAACGGCACCAATGCAGAGAAGCTGGCAGCCAATATCCTGCAGTGGGTGTCATTTGCCCTGTCTGTGGCATGTCTGGGATGGTACGCCTATCAGGCATGGAGAGCCACTTGTGGATGGGAGAACGTGTATGTCGCTCTGATTCAGATGATGAAGAGCATCATTGAGGCCTTCCATTCCTTTGATTCACCAGCTACTCTGTGGCTGTCAAGTGGCAACGGGGTCAGGTGGATGAGATATGGGAGCTGGCTGCTGACCTGCCCCGTGATTCTGATC…
Annotations	Aurora:	1..915			1 ATGGATTACG GCGGAGCCCT GTCAGCAGTC GGCCTGTTTC AGACCTCATA TACCCTGGAG
	ts:	928..987			61 AATAACGGCA GCGTCATCTG TATCCCAAAT AACGGGCAGT GTTTCTGCCT GGCATGGCTG
	eYFP:	1012..1722			121 AAGAGCAACG GCACCAATGC AGAGAAGCTG GCAGCCAATA TCCTGCAGTG GGTGTCATTT
	ßHK:	1723..2034			181 GCCCTGTCTG TGGCATGTCT GGGATGGTAC GCCTATCAGG CATGGAGAGC CACTTGTGGA
	Chrimson:	2074..3120			241 TGGGAGAACG TGTATGTCGC TCTGATTCAG ATGATGAAGA GCATCATTGA GGCCTTCCAT
					301 TCCTTTGATT CACCAGCTAC TCTGTGGCTG TCAAGTGGCA ACGGGGTCAG GTGGATGAGA
					361 TATGGGAGCT GGCTGCTGAC CTGCCCCGTG ATTCTGATCC ACCTGAGCAA CCTGACTGGC
					421 CTGAAGGACG ATTACAGCAA GCGCACTATG GGGCTGCTGG TCTCAGACGT GGGATGTATC
					481 GTGTGGGGCG CCACAAGCGC AATGTGCACA GGCTGGACCA AGATCCTGTT TTTCCTGATC
					541 AGCCTGTCTT ACGGCATGTA CACTTACTTC CATGCCGCAA AGGTGTACAT CGAGGCTTTC
					601 CACACCGTGC CAAAGGGACT GTGCAGACAG CTGGTGCGGG CAATGGCTTG GCTGTTCTTT
					661 GTGAGCTGGG GGATGTTTCC AGTCCTGTTT CTGCTGGGAC CCGAGGGCTT CGGGCACATC
					721 AGCAGATACG GGTCCGCTAT TGGCCACAGC ATTCTGGATC TGATTGCCAA GCAGATGTGG
					781 GGAGTGCTGG GAAACTACCT GAGGGTGAAA ATTCACAGCC ATATCCTGCT GTACGGAGAT
					841 ATCCGCAAGA AGCAGAAAAT CACCATTGCA GGGCAGGAAA TGGAAGTGGA AACTCTGGTC
					901 GCCGAGGAGG AAGACCGTAC GGCGGCCAAG AGCAGGATCA CCAGCGAGGG CGAGTACATC
					961 CCCCTGGACC AGATCGACAT CAACGTGGCG GTACCCGCGG CCGCCACCAT TGTGAGCAAG
					1021 GGCGAGGAGC TGTTCACCGG GGTGGTGCCC ATCCTGGTCG AGCTGGACGG CGACGTAAAC
					1081 GGCCACAAGT TCAGCGTGTC CGGCGAGGGC GAGGGCGATG CCACCTACGG CAAGCTGACC
					1141 CTGAAGTTCA TCTGCACCAC CGGCAAGCTG CCCGTGCCCT GGCCCACCCT CGTGACCACC
					1201 TTCGGCTACG GCCTGCAGTG CTTCGCCCGC TACCCCGACC ACATGAAGCA GCACGACTTC
					1261 TTCAAGTCCG CCATGCCCGA AGGCTACGTC CAGGAGCGCA CCATCTTCTT CAAGGACGAC
					1321 GGCAACTACA AGACCCGCGC CGAGGTGAAG TTCGAGGGCG ACACCCTGGT GAACCGCATC
					1381 GAGCTGAAGG GCATCGACTT CAAGGAGGAC GGCAACATCC TGGGGCACAA GCTGGAGTAC
					1441 AACTACAACA GCCACAACGT CTATATCATG GCCGACAAGC AGAAGAACGG CATCAAGGTG
					1501 AACTTCAAGA TCCGCCACAA CATCGAGGAC GGCAGCGTGC AGCTCGCCGA CCACTACCAG
					1561 CAGAACACCC CCATCGGCGA CGGCCCCGTG CTGCTGCCCG ACAACCACTA CCTGAGCTAC
					1621 CAGTCCGCCC TGAGCAAAGA CCCCAACGAG AAGCGCGATC ACATGGTCCT GCTGGAGTTC
					1681 GTGACCGCCG CCGGGATCAC TCTCGGCATG GACGAGCTGT ACGCAGCCCT GCAGGAGAAG
					1741 AAGTCATGCA GCCAGCGCAT GGCCGAATTC CGGCAATACT GTTGGAACCC GGACACTGGG
					1801 CAGATGCTGG GCCGCACCCC AGCCCGGTGG GTGTGGATCA GCCTGTACTA TGCAGCTTTC
					1861 TACGTGGTCA TGACTGGGCT CTTTGCCTTG TGCATCTATG TGCTGATGCA GACCATTGAT
					1921 CCCTACACCC CCGACTACCA GGACCAGTTA AAGTCACCGG GGGTAACCTT GAGACCGGAT
					1981 GTGTATGGGG AAAGAGGGCT GCAGATTTCC TACAACATCT CTGAAAACAG CTCTAGACAG
					2041 GCCCAGATCA CCGGACGTCC GGAGGGAGCT GTACAAGAGC TGATCAGCAG CGCCACCAGA
					2101 TCTCTGTTTG CCGCCGGAGG CATCAACCCT TGGCCTAACC CCTACCACCA CGAGGACATG
					2161 GGCTGTGGAG GAATGACACC TACAGGCGAG TGCTTCAGCA CCGAGTGGTG GTGTGACCCT
					2221 TCTTACGGAC TGAGCGACGC CGGATACGGA TATTGCTTCG TGGAGGCCAC AGGCGGCTAC
					2281 CTGGTCGTGG GAGTGGAGAA GAAGCAGGCT TGGCTGCACA GCAGAGGCAC ACCAGGAGAA
					2341 AAGATCGGCG CCCAGGTCTG CCAGTGGATT GCTTTCAGCA TCGCCATCGC CCTGCTGACA
					2401 TTCTACGGCT TCAGCGCCTG GAAGGCCACT TGCGGTTGGG AGGAGGTCTA CGTCTGTTGC
					2461 GTCGAGGTGC TGTTCGTGAC CCTGGAGATC TTCAAGGAGT TCAGCAGCCC CGCCACAGTG
					2521 TACCTGTCTA CCGGCAACCA CGCCTATTGC CTGCGCTACT TCGAGTGGCT GCTGTCTTGC
					2581 CCCGTGATCC TGATCAAGCT GAGCAACCTG AGCGGCCTGA AGAACGACTA CAGCAAGCGG
					2641 ACCATGGGCC TGATCGTGTC TTGCGTGGGA ATGATCGTGT TCGGCATGGC CGCAGGACTG
					2701 GCTACCGATT GGCTCAAGTG GCTGCTGTAT ATCGTGTCTT GCATCTACGG CGGCTACATG
					2761 TACTTCCAGG CCGCCAAGTG CTACGTGGAA GCCAACCACA GCGTGCCTAA AGGCCATTGC
					2821 CGCATGGTCG TGAAGCTGAT GGCCTACGCT TACTTCGCCT CTTGGGGCAG CTACCCAATC
					2881 CTCTGGGCAG TGGGACCAGA AGGACTGCTG AAGCTGAGCC CTTACGCCAA CAGCATCGGC
					2941 CACAGCATCT GCGACATCAT CGCCAAGGAG TTTTGGACCT TCCTGGCCCA CCACCTGAGG
					3001 ATCAAGATCC ACGAGCACAT CCTGATCCAC GGCGACATCC GGAAGACCAC CAAGATGGAG
					3061 ATCGGAGGCG AGGAGGTGGA AGTGGAAGAG TTCGTGGAGG AGGAGGACGA GGACACAGTG
					3121 TGA

## Sheet: ArchBlue-L1-Chrimson (HEK cells
Name	ArchBlue-L1-Chrimson (HEK cells)
Sequence	ATGGACCCCATCGCTCTGCAGGCTGGTTACGACCTGCTGGGTGACGGCAGACCTGAAACTCTGTGGCTGGGCATCGGCACTCTGCTGATGCTGATTGGAACCTTCTACTTTCTGGTCCGCGGATGGGGAGTCACCGATAAGGATGCCCGGGAATATTACGCTGTGACTATCCTGGTGCCCGGAATCGCATCCGCCGCATATCTGTCTATGTTCTTTGGTATCGGGCTTACTGAGGTGACCGTCGGGGGCGAAATGTTGGATATCTATTATGCCAGGTACGCCGACTGGCTGTTTACCACCCCACTTCTGCTGCTGGATCTGGCCCTTCTCGCTAAGGTGGATCGGGTGACCATCGGCACCCTGGTGGGTGTGGACGCCCTGGCCATCGTCACTGGCCTC…
Annotations	ArchBlue:	1..804			1 ATGGACCCCA TCGCTCTGCA GGCTGGTTAC GACCTGCTGG GTGACGGCAG ACCTGAAACT
	ts:	817..876			61 CTGTGGCTGG GCATCGGCAC TCTGCTGATG CTGATTGGAA CCTTCTACTT TCTGGTCCGC
	eYFP:	901..1611			121 GGATGGGGAG TCACCGATAA GGATGCCCGG GAATATTACG CTGTGACTAT CCTGGTGCCC
	ßHK:	1612..1923			181 GGAATCGCAT CCGCCGCATA TCTGTCTATG TTCTTTGGTA TCGGGCTTAC TGAGGTGACC
	Chrimson:	1966..3009			241 GTCGGGGGCG AAATGTTGGA TATCTATTAT GCCAGGTACG CCGACTGGCT GTTTACCACC
					301 CCACTTCTGC TGCTGGATCT GGCCCTTCTC GCTAAGGTGG ATCGGGTGAC CATCGGCACC
					361 CTGGTGGGTG TGGACGCCCT GGCCATCGTC ACTGGCCTCA TCGGAGCCTT GAGCCACACG
					421 GCCATAGCCA GATACAGTTG GTGGTTGTTC GCCACAATTT GCATGATAGT GGTGCTCTAT
					481 TTTCTGGCTA CATCCCTGCG ATCTGCTGCA AAGGAGCGGG GCCCCGAGGT GGCATCTACC
					541 TTTAACACCC TGACAGCTCT GGTCTTGGTG CTGTGGACCG CTTACCCTAT CCTGTGGATC
					601 ATAGGCACTG AGGGCGCTGG CGTGGTGGGC CTGGGCATCG AAACTCTGCT GTTTATGGTG
					661 TTGGACGTGA CTACCAAGGT CGGCTTTGGC TTTATCCTGT TGAGATCCCG GGCTATTCTG
					721 GGCGACACCG AGGCACCAGA ACCCAGTGCC GGTGCCGATG TCAGTGCCGC CGACCGACCG
					781 GTAGTAGCAG TGAGCAAGGC GGCCCGTACG GCGGCCAAGA GCAGGATCAC CAGCGAGGGC
					841 GAGTACATCC CCCTGGACCA GATCGACATC AACGTGGCGG TACCCGCGGC CGCCACCATT
					901 GTGAGCAAGG GCGAGGAGCT GTTCACCGGG GTGGTGCCCA TCCTGGTCGA GCTGGACGGC
					961 GACGTAAACG GCCACAAGTT CAGCGTGTCC GGCGAGGGCG AGGGCGATGC CACCTACGGC
					1021 AAGCTGACCC TGAAGTTCAT CTGCACCACC GGCAAGCTGC CCGTGCCCTG GCCCACCCTC
					1081 GTGACCACCT TCGGCTACGG CCTGCAGTGC TTCGCCCGCT ACCCCGACCA CATGAAGCAG
					1141 CACGACTTCT TCAAGTCCGC CATGCCCGAA GGCTACGTCC AGGAGCGCAC CATCTTCTTC
					1201 AAGGACGACG GCAACTACAA GACCCGCGCC GAGGTGAAGT TCGAGGGCGA CACCCTGGTG
					1261 AACCGCATCG AGCTGAAGGG CATCGACTTC AAGGAGGACG GCAACATCCT GGGGCACAAG
					1321 CTGGAGTACA ACTACAACAG CCACAACGTC TATATCATGG CCGACAAGCA GAAGAACGGC
					1381 ATCAAGGTGA ACTTCAAGAT CCGCCACAAC ATCGAGGACG GCAGCGTGCA GCTCGCCGAC
					1441 CACTACCAGC AGAACACCCC CATCGGCGAC GGCCCCGTGC TGCTGCCCGA CAACCACTAC
					1501 CTGAGCTACC AGTCCGCCCT GAGCAAAGAC CCCAACGAGA AGCGCGATCA CATGGTCCTG
					1561 CTGGAGTTCG TGACCGCCGC CGGGATCACT CTCGGCATGG ACGAGCTGTA CGCAGCCCTG
					1621 CAGGAGAAGA AGTCATGCAG CCAGCGCATG GCCGAATTCC GGCAATACTG TTGGAACCCG
					1681 GACACTGGGC AGATGCTGGG CCGCACCCCA GCCCGGTGGG TGTGGATCAG CCTGTACTAT
					1741 GCAGCTTTCT ACGTGGTCAT GACTGGGCTC TTTGCCTTGT GCATCTATGT GCTGATGCAG
					1801 ACCATTGATC CCTACACCCC CGACTACCAG GACCAGTTAA AGTCACCGGG GGTAACCTTG
					1861 AGACCGGATG TGTATGGGGA AAGAGGGCTG CAGATTTCCT ACAACATCTC TGAAAACAGC
					1921 TCTAGACAGG CCCAGATCAC CGGACGTCCG GAGGGAGCTG TACAAGAGCT GATCAGCAGC
					1981 GCCACCAGAT CTCTGTTTGC CGCCGGAGGC ATCAACCCTT GGCCTAACCC CTACCACCAC
					2041 GAGGACATGG GCTGTGGAGG AATGACACCT ACAGGCGAGT GCTTCAGCAC CGAGTGGTGG
					2101 TGTGACCCTT CTTACGGACT GAGCGACGCC GGATACGGAT ATTGCTTCGT GGAGGCCACA
					2161 GGCGGCTACC TGGTCGTGGG AGTGGAGAAG AAGCAGGCTT GGCTGCACAG CAGAGGCACA
					2221 CCAGGAGAAA AGATCGGCGC CCAGGTCTGC CAGTGGATTG CTTTCAGCAT CGCCATCGCC
					2281 CTGCTGACAT TCTACGGCTT CAGCGCCTGG AAGGCCACTT GCGGTTGGGA GGAGGTCTAC
					2341 GTCTGTTGCG TCGAGGTGCT GTTCGTGACC CTGGAGATCT TCAAGGAGTT CAGCAGCCCC
					2401 GCCACAGTGT ACCTGTCTAC CGGCAACCAC GCCTATTGCC TGCGCTACTT CGAGTGGCTG
					2461 CTGTCTTGCC CCGTGATCCT GATCAAGCTG AGCAACCTGA GCGGCCTGAA GAACGACTAC
					2521 AGCAAGCGGA CCATGGGCCT GATCGTGTCT TGCGTGGGAA TGATCGTGTT CGGCATGGCC
					2581 GCAGGACTGG CTACCGATTG GCTCAAGTGG CTGCTGTATA TCGTGTCTTG CATCTACGGC
					2641 GGCTACATGT ACTTCCAGGC CGCCAAGTGC TACGTGGAAG CCAACCACAG CGTGCCTAAA
					2701 GGCCATTGCC GCATGGTCGT GAAGCTGATG GCCTACGCTT ACTTCGCCTC TTGGGGCAGC
					2761 TACCCAATCC TCTGGGCAGT GGGACCAGAA GGACTGCTGA AGCTGAGCCC TTACGCCAAC
					2821 AGCATCGGCC ACAGCATCTG CGACATCATC GCCAAGGAGT TTTGGACCTT CCTGGCCCAC
					2881 CACCTGAGGA TCAAGATCCA CGAGCACATC CTGATCCACG GCGACATCCG GAAGACCACC
					2941 AAGATGGAGA TCGGAGGCGA GGAGGTGGAA GTGGAAGAGT TCGTGGAGGA GGAGGACGAG
					3001 GACACAGTGT GA

## Sheet: GtACR1-L2-Chrimson (HEK cells)
Name	GtACR1-L2-Chrimson (HEK cells)
Sequence	ATGAGCAGCATTACTTGTGACCCAGCCATCTATGGAGAGTGGAGCAGAGAGAACCAGTTTTGCGTCGAAAAGAGCCTGATTACCCTGGACGGCATCAAGTACGTGCAGCTGGTCATGGCCGTGGTGAGCGCCTGCCAGGTGTTCTTTATGGTCACTAGGGCACCCAAAGTGCCTTGGGAGGCCATCTACCTGCCAACCACAGAAATGATCACCTATTCACTGGCTTTCACAGGCAACGGATACATTCGAGTGGCAAATGGGAAGTATCTGCCTTGGGCTAGAATGGCAAGTTGGCTGTGCACATGTCCAATCATGCTGGGCCTGGTGAGCAACATGGCCCTGGTGAAGTACAAATCCATTCCACTGAATCCCATGATGATTGCCGCCAGCAGCATCTGC…
Annotations	GtACR1:	1..881			1 ATGAGCAGCA TTACTTGTGA CCCAGCCATC TATGGAGAGT GGAGCAGAGA GAACCAGTTT
	ts:	895..954			61 TGCGTCGAAA AGAGCCTGAT TACCCTGGAC GGCATCAAGT ACGTGCAGCT GGTCATGGCC
	mCerulean3:	964..1674			121 GTGGTGAGCG CCTGCCAGGT GTTCTTTATG GTCACTAGGG CACCCAAAGT GCCTTGGGAG
	ßHK:	1681..1992			181 GCCATCTACC TGCCAACCAC AGAAATGATC ACCTATTCAC TGGCTTTCAC AGGCAACGGA
	Chrimson:	2032..3081			241 TACATTCGAG TGGCAAATGG GAAGTATCTG CCTTGGGCTA GAATGGCAAG TTGGCTGTGC
					301 ACATGTCCAA TCATGCTGGG CCTGGTGAGC AACATGGCCC TGGTGAAGTA CAAATCCATT
					361 CCACTGAATC CCATGATGAT TGCCGCCAGC AGCATCTGCA CAGTGTTCGG AATCACTGCC
					421 TCCGTGGTCC TGGACCCCCT GCACGTGTGG CTGTACTGTT TCATCTCTAG TATTTTCTTT
					481 ATCTTTGAGA TGGTGGTCGC ATTCGCCATT TTTGCCATCA CTATTCATGA TTTTCAGACC
					541 ATCGGAAGTC CCATGTCACT GAAGGTGGTC GAAAGGCTGA AACTGATGAG AATCGTGTTC
					601 TACGTGAGCT GGATGGCCTA TCCTATCCTG TGGAGTTTTT CAAGCACAGG GGCTTGCATT
					661 ATGTCTGAGA ACACTTCCTC TGTGCTGTAC CTGCTGGGCG ACGCACTGTG CAAAAATACC
					721 TATGGAATCC TGCTGTGGGC TACTACCTGG GGACTGCTGA ACGGCAAGTG GGACCGAGAT
					781 TACGTGAAAG GACGCAATGT CGATGGGACA CTGATGCCCG AATATGAACA GGATCTGGAG
					841 AAAGGCAATA CTGAACGATA TGAGGATGCT CGGGCTGGGG AACGTACGGC GGCCAAGAGC
					901 AGGATCACCA GCGAGGGCGA GTACATCCCC CTGGACCAGA TCGACATCAA CGTGGCGGTA
					961 CCCGTGAGCA AGGGCGAGGA GCTGTTCACC GGGGTGGTGC CCATCCTGGT CGAGCTGGAC
					1021 GGCGACGTAA ACGGCCACAA GTTCAGCGTG TCCGGCGAGG GCGAGGGCGA TGCCACCTAC
					1081 GGCAAGCTGA CCCTGAAGTT CATCTGCACC ACCGGCAAGC TGCCCGTGCC CTGGCCCACC
					1141 CTCGTGACCA CCCTGAGCTG GGGCGTGCAG TGCTTCGCCC GCTACCCCGA CCACATGAAG
					1201 CAGCACGACT TCTTCAAGTC CGCCATGCCC GAAGGCTACG TCCAGGAGCG CACCATCTTC
					1261 TTCAAGGACG ACGGCAACTA CAAGACCCGC GCCGAGGTGA AGTTCGAGGG CGACACCCTG
					1321 GTGAACCGCA TCGAGCTGAA GGGCATCGAC TTCAAGGAGG ACGGCAACAT CCTGGGGCAC
					1381 AAGCTGGAGT ACAACGCCAT CCACGGCAAC GTCTATATCA CCGCCGACAA GCAGAAGAAC
					1441 GGCATCAAGG CCAACTTCGG CCTCAACTGC AACATCGAGG ACGGCAGCGT GCAGCTCGCC
					1501 GACCACTACC AGCAGAACAC CCCCATCGGC GACGGCCCCG TGCTGCTGCC CGACAACCAC
					1561 TACCTGAGCA CCCAGTCCAA GCTGAGCAAA GACCCCAACG AGAAGCGCGA TCACATGGTC
					1621 CTGCTGGAGT TCGTGACCGC CGCCGGGATC ACTCTCGGCA TGGACGAGCT GTATACCGGT
					1681 GCAGCCCTGC AGGAGAAGAA GTCATGCAGC CAGCGCATGG CCGAATTCCG GCAATACTGT
					1741 TGGAACCCGG ACACTGGGCA GATGCTGGGC CGCACCCCAG CCCGGTGGGT GTGGATCAGC
					1801 CTGTACTATG CAGCTTTCTA CGTGGTCATG ACTGGGCTCT TTGCCTTGTG CATCTATGTG
					1861 CTGATGCAGA CCATTGATCC CTACACCCCC GACTACCAGG ACCAGTTAAA GTCACCGGGG
					1921 GTAACCTTGA GACCGGATGT GTATGGGGAA AGAGGGCTGC AGATTTCCTA CAACATCTCT
					1981 GAAAACAGCT CTAGACAGGC CCAGATCACC GGACGTCCGG AGGGAGCTGT ACAAGAGCTG
					2041 ATCAGCAGCG CCACCAGATC TCTGTTTGCC GCCGGAGGCA TCAACCCTTG GCCTAACCCC
					2101 TACCACCACG AGGACATGGG CTGTGGAGGA ATGACACCTA CAGGCGAGTG CTTCAGCACC
					2161 GAGTGGTGGT GTGACCCTTC TTACGGACTG AGCGACGCCG GATACGGATA TTGCTTCGTG
					2221 GAGGCCACAG GCGGCTACCT GGTCGTGGGA GTGGAGAAGA AGCAGGCTTG GCTGCACAGC
					2281 AGAGGCACAC CAGGAGAAAA GATCGGCGCC CAGGTCTGCC AGTGGATTGC TTTCAGCATC
					2341 GCCATCGCCC TGCTGACATT CTACGGCTTC AGCGCCTGGA AGGCCACTTG CGGTTGGGAG
					2401 GAGGTCTACG TCTGTTGCGT CGAGGTGCTG TTCGTGACCC TGGAGATCTT CAAGGAGTTC
					2461 AGCAGCCCCG CCACAGTGTA CCTGTCTACC GGCAACCACG CCTATTGCCT GCGCTACTTC
					2521 GAGTGGCTGC TGTCTTGCCC CGTGATCCTG ATCAAGCTGA GCAACCTGAG CGGCCTGAAG
					2581 AACGACTACA GCAAGCGGAC CATGGGCCTG ATCGTGTCTT GCGTGGGAAT GATCGTGTTC
					2641 GGCATGGCCG CAGGACTGGC TACCGATTGG CTCAAGTGGC TGCTGTATAT CGTGTCTTGC
					2701 ATCTACGGCG GCTACATGTA CTTCCAGGCC GCCAAGTGCT ACGTGGAAGC CAACCACAGC
					2761 GTGCCTAAAG GCCATTGCCG CATGGTCGTG AAGCTGATGG CCTACGCTTA CTTCGCCTCT
					2821 TGGGGCAGCT ACCCAATCCT CTGGGCAGTG GGACCAGAAG GACTGCTGAA GCTGAGCCCT
					2881 TACGCCAACA GCATCGGCCA CAGCATCTGC GACATCATCG CCAAGGAGTT TTGGACCTTC
					2941 CTGGCCCACC ACCTGAGGAT CAAGATCCAC GAGCACATCC TGATCCACGG CGACATCCGG
					3001 AAGACCACCA AGATGGAGAT CGGAGGCGAG GAGGTGGAAG TGGAAGAGTT CGTGGAGGAG
					3061 GAGGACGAGG ACACAGTGTG A

## Sheet: GtACR2-L2-Chrimson (BiPOLES, HE
Name	GtACR2-L2-Chrimson (BiPOLES, HEK cells)
Sequence	ATGGCATCACAGGTCGTCTATGGGGAATGGGCATCAACTCACACCGAGTGCTACAATATGTCCAGAATCGACTCCACCTTCGTCTCACTGCTGCAGCTGGTGTGGGCCGTGGTCTCAGGCTGCCAGACAATCTTCATGATTAGCAGGGCTCCCAAGGTCCCTTGGGAGTCCGTGTACCTGCCCTTTGTCGAATCTATCACTTATGCACTGGCCAGTACTGGCAACGGAACCCTGCAGATGAGGGACGGCAGATTCTTTCCTTGGAGCCGAATGGCCTCCTGGCTGTGCACCTGTCCAATCATGCTGGGACAGATTTCTAACATGGCTCTGGTGAAGTACAAAAGTATCCCACTGAATCCCATTGCACAGGCCGCTTCCATCATTAGAGTGGTCATGGGA…
Annotations	GtACR2:	1..873			1 ATGGCATCAC AGGTCGTCTA TGGGGAATGG GCATCAACTC ACACCGAGTG CTACAATATG
	ts:	889..948			61 TCCAGAATCG ACTCCACCTT CGTCTCACTG CTGCAGCTGG TGTGGGCCGT GGTCTCAGGC
	mCerulean3:	958..1668			121 TGCCAGACAA TCTTCATGAT TAGCAGGGCT CCCAAGGTCC CTTGGGAGTC CGTGTACCTG
	ßHK:	1675..1986			181 CCCTTTGTCG AATCTATCAC TTATGCACTG GCCAGTACTG GCAACGGAAC CCTGCAGATG
	Chrimson:	2026..3075			241 AGGGACGGCA GATTCTTTCC TTGGAGCCGA ATGGCCTCCT GGCTGTGCAC CTGTCCAATC
					301 ATGCTGGGAC AGATTTCTAA CATGGCTCTG GTGAAGTACA AAAGTATCCC ACTGAATCCC
					361 ATTGCACAGG CCGCTTCCAT CATTAGAGTG GTCATGGGAA TCACCGCTAC AATTTCTCCC
					421 GCAGAGTATA TGAAGTGGCT GTTCTTTTTC TTTGGGGCCA CCTGCCTGGT GTTCGAGTAC
					481 AGTGTGGTCT TCACAATCTT TCAAGTGGGG CTGTATGGCT TTGAATCTGT CGGGACACCT
					541 CTGGCACAGA AGGTGGTGGT GAGGATCAAG ATGCTGCGCC TGATCTTCTT TATTGCTTGG
					601 ACTATGTTCC CAATCGTGTG GCTGATTTCA CCCACCGGAG TCTGCGTGAT CCACGAGAAC
					661 GTGAGCGCCA TTCTGTACCT GCTGGCTGAC GGCCTGTGCA AAAATACATA TGGAGTGATC
					721 CTGTGGAGCA CTGCCTGGGG AGTGCTGGAA GGGAAGTGGG ACCCCGCATG TCTGCCAGGG
					781 CAGGAGAAAC CCGAAGCCGA CGATCCTTTT GGCCTGAATC ACGAGAAGAA TGCCCCTCCT
					841 AACGACGAAG TCAATATCAG AATGTTTGGA AGGGGACGTA CGGCGGCCAA GAGCAGGATC
					901 ACCAGCGAGG GCGAGTACAT CCCCCTGGAC CAGATCGACA TCAACGTGGC GGTACCCGTG
					961 AGCAAGGGCG AGGAGCTGTT CACCGGGGTG GTGCCCATCC TGGTCGAGCT GGACGGCGAC
					1021 GTAAACGGCC ACAAGTTCAG CGTGTCCGGC GAGGGCGAGG GCGATGCCAC CTACGGCAAG
					1081 CTGACCCTGA AGTTCATCTG CACCACCGGC AAGCTGCCCG TGCCCTGGCC CACCCTCGTG
					1141 ACCACCCTGA GCTGGGGCGT GCAGTGCTTC GCCCGCTACC CCGACCACAT GAAGCAGCAC
					1201 GACTTCTTCA AGTCCGCCAT GCCCGAAGGC TACGTCCAGG AGCGCACCAT CTTCTTCAAG
					1261 GACGACGGCA ACTACAAGAC CCGCGCCGAG GTGAAGTTCG AGGGCGACAC CCTGGTGAAC
					1321 CGCATCGAGC TGAAGGGCAT CGACTTCAAG GAGGACGGCA ACATCCTGGG GCACAAGCTG
					1381 GAGTACAACG CCATCCACGG CAACGTCTAT ATCACCGCCG ACAAGCAGAA GAACGGCATC
					1441 AAGGCCAACT TCGGCCTCAA CTGCAACATC GAGGACGGCA GCGTGCAGCT CGCCGACCAC
					1501 TACCAGCAGA ACACCCCCAT CGGCGACGGC CCCGTGCTGC TGCCCGACAA CCACTACCTG
					1561 AGCACCCAGT CCAAGCTGAG CAAAGACCCC AACGAGAAGC GCGATCACAT GGTCCTGCTG
					1621 GAGTTCGTGA CCGCCGCCGG GATCACTCTC GGCATGGACG AGCTGTATAC CGGTGCAGCC
					1681 CTGCAGGAGA AGAAGTCATG CAGCCAGCGC ATGGCCGAAT TCCGGCAATA CTGTTGGAAC
					1741 CCGGACACTG GGCAGATGCT GGGCCGCACC CCAGCCCGGT GGGTGTGGAT CAGCCTGTAC
					1801 TATGCAGCTT TCTACGTGGT CATGACTGGG CTCTTTGCCT TGTGCATCTA TGTGCTGATG
					1861 CAGACCATTG ATCCCTACAC CCCCGACTAC CAGGACCAGT TAAAGTCACC GGGGGTAACC
					1921 TTGAGACCGG ATGTGTATGG GGAAAGAGGG CTGCAGATTT CCTACAACAT CTCTGAAAAC
					1981 AGCTCTAGAC AGGCCCAGAT CACCGGACGT CCGGAGGGAG CTGTACAAGA GCTGATCAGC
					2041 AGCGCCACCA GATCTCTGTT TGCCGCCGGA GGCATCAACC CTTGGCCTAA CCCCTACCAC
					2101 CACGAGGACA TGGGCTGTGG AGGAATGACA CCTACAGGCG AGTGCTTCAG CACCGAGTGG
					2161 TGGTGTGACC CTTCTTACGG ACTGAGCGAC GCCGGATACG GATATTGCTT CGTGGAGGCC
					2221 ACAGGCGGCT ACCTGGTCGT GGGAGTGGAG AAGAAGCAGG CTTGGCTGCA CAGCAGAGGC
					2281 ACACCAGGAG AAAAGATCGG CGCCCAGGTC TGCCAGTGGA TTGCTTTCAG CATCGCCATC
					2341 GCCCTGCTGA CATTCTACGG CTTCAGCGCC TGGAAGGCCA CTTGCGGTTG GGAGGAGGTC
					2401 TACGTCTGTT GCGTCGAGGT GCTGTTCGTG ACCCTGGAGA TCTTCAAGGA GTTCAGCAGC
					2461 CCCGCCACAG TGTACCTGTC TACCGGCAAC CACGCCTATT GCCTGCGCTA CTTCGAGTGG
					2521 CTGCTGTCTT GCCCCGTGAT CCTGATCAAG CTGAGCAACC TGAGCGGCCT GAAGAACGAC
					2581 TACAGCAAGC GGACCATGGG CCTGATCGTG TCTTGCGTGG GAATGATCGT GTTCGGCATG
					2641 GCCGCAGGAC TGGCTACCGA TTGGCTCAAG TGGCTGCTGT ATATCGTGTC TTGCATCTAC
					2701 GGCGGCTACA TGTACTTCCA GGCCGCCAAG TGCTACGTGG AAGCCAACCA CAGCGTGCCT
					2761 AAAGGCCATT GCCGCATGGT CGTGAAGCTG ATGGCCTACG CTTACTTCGC CTCTTGGGGC
					2821 AGCTACCCAA TCCTCTGGGC AGTGGGACCA GAAGGACTGC TGAAGCTGAG CCCTTACGCC
					2881 AACAGCATCG GCCACAGCAT CTGCGACATC ATCGCCAAGG AGTTTTGGAC CTTCCTGGCC
					2941 CACCACCTGA GGATCAAGAT CCACGAGCAC ATCCTGATCC ACGGCGACAT CCGGAAGACC
					3001 ACCAAGATGG AGATCGGAGG CGAGGAGGTG GAAGTGGAAG AGTTCGTGGA GGAGGAGGAC
					3061 GAGGACACAG TGTGA

## Sheet: CsChrimson-L2-GtACR2 (HEK cells
Name	CsChrimson-L2-GtACR2 (HEK cells)
Sequence	ATGAGCAGACTGGTCGCCGCTTCTTGGCTGCTGGCTCTCCTCCTCTGCGGAATTACCAGCACAACAACAGCCTCTAGCGCCCCAGCAGCTTCTTCTACAGACGGAACAGCCGCCGCAGCAGTGTCTCACTACGCCATGAACGGCTTCGACGAGCTGGCTAAAGGAGCCGTGGTGCCAGAAGACCACTTTGTCTGCGGACCAGCCGACAAGTGCTATTGCTCCGCTTGGCTGCACAGCAGAGGCACACCAGGAGAAAAGATCGGCGCCCAGGTCTGCCAGTGGATTGCTTTCAGCATCGCCATCGCCCTGCTGACATTCTACGGCTTCAGCGCCTGGAAGGCCACTTGCGGTTGGGAGGAGGTCTACGTCTGTTGCGTCGAGGTGCTGTTCGTGACCCTG…
Annotations	CsChrimson:	1..1035			1 ATGAGCAGAC TGGTCGCCGC TTCTTGGCTG CTGGCTCTCC TCCTCTGCGG AATTACCAGC
	ts:	1048..1104			61 ACAACAACAG CCTCTAGCGC CCCAGCAGCT TCTTCTACAG ACGGAACAGC CGCCGCAGCA
	mCerulean3:	1117..1827			121 GTGTCTCACT ACGCCATGAA CGGCTTCGAC GAGCTGGCTA AAGGAGCCGT GGTGCCAGAA
	ßHK:	1834..2145			181 GACCACTTTG TCTGCGGACC AGCCGACAAG TGCTATTGCT CCGCTTGGCT GCACAGCAGA
	GtACR2:	2188..3057			241 GGCACACCAG GAGAAAAGAT CGGCGCCCAG GTCTGCCAGT GGATTGCTTT CAGCATCGCC
					301 ATCGCCCTGC TGACATTCTA CGGCTTCAGC GCCTGGAAGG CCACTTGCGG TTGGGAGGAG
					361 GTCTACGTCT GTTGCGTCGA GGTGCTGTTC GTGACCCTGG AGATCTTCAA GGAGTTCAGC
					421 AGCCCCGCCA CAGTGTACCT GTCTACCGGC AACCACGCCT ATTGCCTGCG CTACTTCGAG
					481 TGGCTGCTGT CTTGCCCCGT GATCCTGATC AAGCTGAGCA ACCTGAGCGG CCTGAAGAAC
					541 GACTACAGCA AGCGGACCAT GGGCCTGATC GTGTCTTGCG TGGGAATGAT CGTGTTCGGC
					601 ATGGCCGCAG GACTGGCTAC CGATTGGCTC AAGTGGCTGC TGTATATCGT GTCTTGCATC
					661 TACGGCGGCT ACATGTACTT CCAGGCCGCC AAGTGCTACG TGGAAGCCAA CCACAGCGTG
					721 CCTAAAGGCC ATTGCCGCAT GGTCGTGAAG CTGATGGCCT ACGCTTACTT CGCCTCTTGG
					781 GGCAGCTACC CAATCCTCTG GGCAGTGGGA CCAGAAGGAC TGCTGAAGCT GAGCCCTTAC
					841 GCCAACAGCA TCGGCCACAG CATCTGCGAC ATCATCGCCA AGGAGTTTTG GACCTTCCTG
					901 GCCCACCACC TGAGGATCAA GATCCACGAG CACATCCTGA TCCACGGCGA CATCCGGAAG
					961 ACCACCAAGA TGGAGATCGG AGGCGAGGAG GTGGAAGTGG AAGAGTTCGT GGAGGAGGAG
					1021 GACGAGGACA CAGTGCGTAC GGCGGCCAAG AGCAGGATCA CCAGCGAGGG CGAGTACATC
					1081 CCCCTGGACC AGATCGACAT CAACGTGGCG GTACCCGTGA GCAAGGGCGA GGAGCTGTTC
					1141 ACCGGGGTGG TGCCCATCCT GGTCGAGCTG GACGGCGACG TAAACGGCCA CAAGTTCAGC
					1201 GTGTCCGGCG AGGGCGAGGG CGATGCCACC TACGGCAAGC TGACCCTGAA GTTCATCTGC
					1261 ACCACCGGCA AGCTGCCCGT GCCCTGGCCC ACCCTCGTGA CCACCCTGAG CTGGGGCGTG
					1321 CAGTGCTTCG CCCGCTACCC CGACCACATG AAGCAGCACG ACTTCTTCAA GTCCGCCATG
					1381 CCCGAAGGCT ACGTCCAGGA GCGCACCATC TTCTTCAAGG ACGACGGCAA CTACAAGACC
					1441 CGCGCCGAGG TGAAGTTCGA GGGCGACACC CTGGTGAACC GCATCGAGCT GAAGGGCATC
					1501 GACTTCAAGG AGGACGGCAA CATCCTGGGG CACAAGCTGG AGTACAACGC CATCCACGGC
					1561 AACGTCTATA TCACCGCCGA CAAGCAGAAG AACGGCATCA AGGCCAACTT CGGCCTCAAC
					1621 TGCAACATCG AGGACGGCAG CGTGCAGCTC GCCGACCACT ACCAGCAGAA CACCCCCATC
					1681 GGCGACGGCC CCGTGCTGCT GCCCGACAAC CACTACCTGA GCACCCAGTC CAAGCTGAGC
					1741 AAAGACCCCA ACGAGAAGCG CGATCACATG GTCCTGCTGG AGTTCGTGAC CGCCGCCGGG
					1801 ATCACTCTCG GCATGGACGA GCTGTATACC GGTGCAGCCC TGCAGGAGAA GAAGTCATGC
					1861 AGCCAGCGCA TGGCCGAATT CCGGCAATAC TGTTGGAACC CGGACACTGG GCAGATGCTG
					1921 GGCCGCACCC CAGCCCGGTG GGTGTGGATC AGCCTGTACT ATGCAGCTTT CTACGTGGTC
					1981 ATGACTGGGC TCTTTGCCTT GTGCATCTAT GTGCTGATGC AGACCATTGA TCCCTACACC
					2041 CCCGACTACC AGGACCAGTT AAAGTCACCG GGGGTAACCT TGAGACCGGA TGTGTATGGG
					2101 GAAAGAGGGC TGCAGATTTC CTACAACATC TCTGAAAACA GCTCTAGACA GGCCCAGATC
					2161 ACCGGACGTC CGGAGGGAGC TGTACAAGCA TCACAGGTCG TCTATGGGGA ATGGGCATCA
					2221 ACTCACACCG AGTGCTACAA TATGTCCAGA ATCGACTCCA CCTTCGTCTC ACTGCTGCAG
					2281 CTGGTGTGGG CCGTGGTCTC AGGCTGCCAG ACAATCTTCA TGATTAGCAG GGCTCCCAAG
					2341 GTCCCTTGGG AGTCCGTGTA CCTGCCCTTT GTCGAATCTA TCACTTATGC ACTGGCCAGT
					2401 ACTGGCAACG GAACCCTGCA GATGAGGGAC GGCAGATTCT TTCCTTGGAG CCGAATGGCC
					2461 TCCTGGCTGT GCACCTGTCC AATCATGCTG GGACAGATTT CTAACATGGC TCTGGTGAAG
					2521 TACAAAAGTA TCCCACTGAA TCCCATTGCA CAGGCCGCTT CCATCATTAG AGTGGTCATG
					2581 GGAATCACCG CTACAATTTC TCCCGCAGAG TATATGAAGT GGCTGTTCTT TTTCTTTGGG
					2641 GCCACCTGCC TGGTGTTCGA GTACAGTGTG GTCTTCACAA TCTTTCAAGT GGGGCTGTAT
					2701 GGCTTTGAAT CTGTCGGGAC ACCTCTGGCA CAGAAGGTGG TGGTGAGGAT CAAGATGCTG
					2761 CGCCTGATCT TCTTTATTGC TTGGACTATG TTCCCAATCG TGTGGCTGAT TTCACCCACC
					2821 GGAGTCTGCG TGATCCACGA GAACGTGAGC GCCATTCTGT ACCTGCTGGC TGACGGCCTG
					2881 TGCAAAAATA CATATGGAGT GATCCTGTGG AGCACTGCCT GGGGAGTGCT GGAAGGGAAG
					2941 TGGGACCCCG CATGTCTGCC AGGGCAGGAG AAACCCGAAG CCGACGATCC TTTTGGCCTG
					3001 AATCACGAGA AGAATGCCCC TCCTAACGAC GAAGTCAATA TCAGAATGTT TGGAAGGTGA

## Sheet: GtACR2-L3-Chrimson (HEK cells)
Name	GtACR2-L3-Chrimson (HEK cells)
Sequence	ATGGCATCACAGGTCGTCTATGGGGAATGGGCATCAACTCACACCGAGTGCTACAATATGTCCAGAATCGACTCCACCTTCGTCTCACTGCTGCAGCTGGTGTGGGCCGTGGTCTCAGGCTGCCAGACAATCTTCATGATTAGCAGGGCTCCCAAGGTCCCTTGGGAGTCCGTGTACCTGCCCTTTGTCGAATCTATCACTTATGCACTGGCCAGTACTGGCAACGGAACCCTGCAGATGAGGGACGGCAGATTCTTTCCTTGGAGCCGAATGGCCTCCTGGCTGTGCACCTGTCCAATCATGCTGGGACAGATTTCTAACATGGCTCTGGTGAAGTACAAAAGTATCCCACTGAATCCCATTGCACAGGCCGCTTCCATCATTAGAGTGGTCATGGGA…
Annotations	GtACR2:	1..873			1 ATGGCATCAC AGGTCGTCTA TGGGGAATGG GCATCAACTC ACACCGAGTG CTACAATATG
	ts:	889..948			61 TCCAGAATCG ACTCCACCTT CGTCTCACTG CTGCAGCTGG TGTGGGCCGT GGTCTCAGGC
	mCerulean3:	958..1668			121 TGCCAGACAA TCTTCATGAT TAGCAGGGCT CCCAAGGTCC CTTGGGAGTC CGTGTACCTG
	Chrimson:	1681..2727			181 CCCTTTGTCG AATCTATCAC TTATGCACTG GCCAGTACTG GCAACGGAAC CCTGCAGATG
	ER-export:	2728..2751			241 AGGGACGGCA GATTCTTTCC TTGGAGCCGA ATGGCCTCCT GGCTGTGCAC CTGTCCAATC
					301 ATGCTGGGAC AGATTTCTAA CATGGCTCTG GTGAAGTACA AAAGTATCCC ACTGAATCCC
					361 ATTGCACAGG CCGCTTCCAT CATTAGAGTG GTCATGGGAA TCACCGCTAC AATTTCTCCC
					421 GCAGAGTATA TGAAGTGGCT GTTCTTTTTC TTTGGGGCCA CCTGCCTGGT GTTCGAGTAC
					481 AGTGTGGTCT TCACAATCTT TCAAGTGGGG CTGTATGGCT TTGAATCTGT CGGGACACCT
					541 CTGGCACAGA AGGTGGTGGT GAGGATCAAG ATGCTGCGCC TGATCTTCTT TATTGCTTGG
					601 ACTATGTTCC CAATCGTGTG GCTGATTTCA CCCACCGGAG TCTGCGTGAT CCACGAGAAC
					661 GTGAGCGCCA TTCTGTACCT GCTGGCTGAC GGCCTGTGCA AAAATACATA TGGAGTGATC
					721 CTGTGGAGCA CTGCCTGGGG AGTGCTGGAA GGGAAGTGGG ACCCCGCATG TCTGCCAGGG
					781 CAGGAGAAAC CCGAAGCCGA CGATCCTTTT GGCCTGAATC ACGAGAAGAA TGCCCCTCCT
					841 AACGACGAAG TCAATATCAG AATGTTTGGA AGGGGACGTA CGGCGGCCAA GAGCAGGATC
					901 ACCAGCGAGG GCGAGTACAT CCCCCTGGAC CAGATCGACA TCAACGTGGC GGTACCCGTG
					961 AGCAAGGGCG AGGAGCTGTT CACCGGGGTG GTGCCCATCC TGGTCGAGCT GGACGGCGAC
					1021 GTAAACGGCC ACAAGTTCAG CGTGTCCGGC GAGGGCGAGG GCGATGCCAC CTACGGCAAG
					1081 CTGACCCTGA AGTTCATCTG CACCACCGGC AAGCTGCCCG TGCCCTGGCC CACCCTCGTG
					1141 ACCACCCTGA GCTGGGGCGT GCAGTGCTTC GCCCGCTACC CCGACCACAT GAAGCAGCAC
					1201 GACTTCTTCA AGTCCGCCAT GCCCGAAGGC TACGTCCAGG AGCGCACCAT CTTCTTCAAG
					1261 GACGACGGCA ACTACAAGAC CCGCGCCGAG GTGAAGTTCG AGGGCGACAC CCTGGTGAAC
					1321 CGCATCGAGC TGAAGGGCAT CGACTTCAAG GAGGACGGCA ACATCCTGGG GCACAAGCTG
					1381 GAGTACAACG CCATCCACGG CAACGTCTAT ATCACCGCCG ACAAGCAGAA GAACGGCATC
					1441 AAGGCCAACT TCGGCCTCAA CTGCAACATC GAGGACGGCA GCGTGCAGCT CGCCGACCAC
					1501 TACCAGCAGA ACACCCCCAT CGGCGACGGC CCCGTGCTGC TGCCCGACAA CCACTACCTG
					1561 AGCACCCAGT CCAAGCTGAG CAAAGACCCC AACGAGAAGC GCGATCACAT GGTCCTGCTG
					1621 GAGTTCGTGA CCGCCGCCGG GATCACTCTC GGCATGGACG AGCTGTATAC CGGTGCAGCC
					1681 CAAGAGCTGA TCAGCAGCGC CACCAGATCT CTGTTTGCCG CCGGAGGCAT CAACCCTTGG
					1741 CCTAACCCCT ACCACCACGA GGACATGGGC TGTGGAGGAA TGACACCTAC AGGCGAGTGC
					1801 TTCAGCACCG AGTGGTGGTG TGACCCTTCT TACGGACTGA GCGACGCCGG ATACGGATAT
					1861 TGCTTCGTGG AGGCCACAGG CGGCTACCTG GTCGTGGGAG TGGAGAAGAA GCAGGCTTGG
					1921 CTGCACAGCA GAGGCACACC AGGAGAAAAG ATCGGCGCCC AGGTCTGCCA GTGGATTGCT
					1981 TTCAGCATCG CCATCGCCCT GCTGACATTC TACGGCTTCA GCGCCTGGAA GGCCACTTGC
					2041 GGTTGGGAGG AGGTCTACGT CTGTTGCGTC GAGGTGCTGT TCGTGACCCT GGAGATCTTC
					2101 AAGGAGTTCA GCAGCCCCGC CACAGTGTAC CTGTCTACCG GCAACCACGC CTATTGCCTG
					2161 CGCTACTTCG AGTGGCTGCT GTCTTGCCCC GTGATCCTGA TCAAGCTGAG CAACCTGAGC
					2221 GGCCTGAAGA ACGACTACAG CAAGCGGACC ATGGGCCTGA TCGTGTCTTG CGTGGGAATG
					2281 ATCGTGTTCG GCATGGCCGC AGGACTGGCT ACCGATTGGC TCAAGTGGCT GCTGTATATC
					2341 GTGTCTTGCA TCTACGGCGG CTACATGTAC TTCCAGGCCG CCAAGTGCTA CGTGGAAGCC
					2401 AACCACAGCG TGCCTAAAGG CCATTGCCGC ATGGTCGTGA AGCTGATGGC CTACGCTTAC
					2461 TTCGCCTCTT GGGGCAGCTA CCCAATCCTC TGGGCAGTGG GACCAGAAGG ACTGCTGAAG
					2521 CTGAGCCCTT ACGCCAACAG CATCGGCCAC AGCATCTGCG ACATCATCGC CAAGGAGTTT
					2581 TGGACCTTCC TGGCCCACCA CCTGAGGATC AAGATCCACG AGCACATCCT GATCCACGGC
					2641 GACATCCGGA AGACCACCAA GATGGAGATC GGAGGCGAGG AGGTGGAAGT GGAAGAGTTC
					2701 GTGGAGGAGG AGGACGAGGA CACAGTGTTC TGCTACGAGA ACGAGGTGTA A

## Sheet: GtACR2-L4-Chrimson-mCerulean (H
Name	GtACR2-L4-Chrimson-mCerulean (HEK cells)
Sequence	ATGGCATCACAGGTCGTCTATGGGGAATGGGCATCAACTCACACCGAGTGCTACAATATGTCCAGAATCGACTCCACCTTCGTCTCACTGCTGCAGCTGGTGTGGGCCGTGGTCTCAGGCTGCCAGACAATCTTCATGATTAGCAGGGCTCCCAAGGTCCCTTGGGAGTCCGTGTACCTGCCCTTTGTCGAATCTATCACTTATGCACTGGCCAGTACTGGCAACGGAACCCTGCAGATGAGGGACGGCAGATTCTTTCCTTGGAGCCGAATGGCCTCCTGGCTGTGCACCTGTCCAATCATGCTGGGACAGATTTCTAACATGGCTCTGGTGAAGTACAAAAGTATCCCACTGAATCCCATTGCACAGGCCGCTTCCATCATTAGAGTGGTCATGGGA…
Annotations	GtACR2:	1..873			1 ATGGCATCAC AGGTCGTCTA TGGGGAATGG GCATCAACTC ACACCGAGTG CTACAATATG
	ts:	889..948			61 TCCAGAATCG ACTCCACCTT CGTCTCACTG CTGCAGCTGG TGTGGGCCGT GGTCTCAGGC
	ßHK:	955..1266			121 TGCCAGACAA TCTTCATGAT TAGCAGGGCT CCCAAGGTCC CTTGGGAGTC CGTGTACCTG
	Chrimson:	1306..2352			181 CCCTTTGTCG AATCTATCAC TTATGCACTG GCCAGTACTG GCAACGGAAC CCTGCAGATG
	mCerulean3:	2362..3075			241 AGGGACGGCA GATTCTTTCC TTGGAGCCGA ATGGCCTCCT GGCTGTGCAC CTGTCCAATC
					301 ATGCTGGGAC AGATTTCTAA CATGGCTCTG GTGAAGTACA AAAGTATCCC ACTGAATCCC
					361 ATTGCACAGG CCGCTTCCAT CATTAGAGTG GTCATGGGAA TCACCGCTAC AATTTCTCCC
					421 GCAGAGTATA TGAAGTGGCT GTTCTTTTTC TTTGGGGCCA CCTGCCTGGT GTTCGAGTAC
					481 AGTGTGGTCT TCACAATCTT TCAAGTGGGG CTGTATGGCT TTGAATCTGT CGGGACACCT
					541 CTGGCACAGA AGGTGGTGGT GAGGATCAAG ATGCTGCGCC TGATCTTCTT TATTGCTTGG
					601 ACTATGTTCC CAATCGTGTG GCTGATTTCA CCCACCGGAG TCTGCGTGAT CCACGAGAAC
					661 GTGAGCGCCA TTCTGTACCT GCTGGCTGAC GGCCTGTGCA AAAATACATA TGGAGTGATC
					721 CTGTGGAGCA CTGCCTGGGG AGTGCTGGAA GGGAAGTGGG ACCCCGCATG TCTGCCAGGG
					781 CAGGAGAAAC CCGAAGCCGA CGATCCTTTT GGCCTGAATC ACGAGAAGAA TGCCCCTCCT
					841 AACGACGAAG TCAATATCAG AATGTTTGGA AGGGGACGTA CGGCGGCCAA GAGCAGGATC
					901 ACCAGCGAGG GCGAGTACAT CCCCCTGGAC CAGATCGACA TCAACGTGGC GGTAGCAGCC
					961 CTGCAGGAGA AGAAGTCATG CAGCCAGCGC ATGGCCGAAT TCCGGCAATA CTGTTGGAAC
					1021 CCGGACACTG GGCAGATGCT GGGCCGCACC CCAGCCCGGT GGGTGTGGAT CAGCCTGTAC
					1081 TATGCAGCTT TCTACGTGGT CATGACTGGG CTCTTTGCCT TGTGCATCTA TGTGCTGATG
					1141 CAGACCATTG ATCCCTACAC CCCCGACTAC CAGGACCAGT TAAAGTCACC GGGGGTAACC
					1201 TTGAGACCGG ATGTGTATGG GGAAAGAGGG CTGCAGATTT CCTACAACAT CTCTGAAAAC
					1261 AGCTCTAGAC AGGCCCAGAT CACCGGACGT CCGGAGGGAG CTGTACAAGA GCTGATCAGC
					1321 AGCGCCACCA GATCTCTGTT TGCCGCCGGA GGCATCAACC CTTGGCCTAA CCCCTACCAC
					1381 CACGAGGACA TGGGCTGTGG AGGAATGACA CCTACAGGCG AGTGCTTCAG CACCGAGTGG
					1441 TGGTGTGACC CTTCTTACGG ACTGAGCGAC GCCGGATACG GATATTGCTT CGTGGAGGCC
					1501 ACAGGCGGCT ACCTGGTCGT GGGAGTGGAG AAGAAGCAGG CTTGGCTGCA CAGCAGAGGC
					1561 ACACCAGGAG AAAAGATCGG CGCCCAGGTC TGCCAGTGGA TTGCTTTCAG CATCGCCATC
					1621 GCCCTGCTGA CATTCTACGG CTTCAGCGCC TGGAAGGCCA CTTGCGGTTG GGAGGAGGTC
					1681 TACGTCTGTT GCGTCGAGGT GCTGTTCGTG ACCCTGGAGA TCTTCAAGGA GTTCAGCAGC
					1741 CCCGCCACAG TGTACCTGTC TACCGGCAAC CACGCCTATT GCCTGCGCTA CTTCGAGTGG
					1801 CTGCTGTCTT GCCCCGTGAT CCTGATCAAG CTGAGCAACC TGAGCGGCCT GAAGAACGAC
					1861 TACAGCAAGC GGACCATGGG CCTGATCGTG TCTTGCGTGG GAATGATCGT GTTCGGCATG
					1921 GCCGCAGGAC TGGCTACCGA TTGGCTCAAG TGGCTGCTGT ATATCGTGTC TTGCATCTAC
					1981 GGCGGCTACA TGTACTTCCA GGCCGCCAAG TGCTACGTGG AAGCCAACCA CAGCGTGCCT
					2041 AAAGGCCATT GCCGCATGGT CGTGAAGCTG ATGGCCTACG CTTACTTCGC CTCTTGGGGC
					2101 AGCTACCCAA TCCTCTGGGC AGTGGGACCA GAAGGACTGC TGAAGCTGAG CCCTTACGCC
					2161 AACAGCATCG GCCACAGCAT CTGCGACATC ATCGCCAAGG AGTTTTGGAC CTTCCTGGCC
					2221 CACCACCTGA GGATCAAGAT CCACGAGCAC ATCCTGATCC ACGGCGACAT CCGGAAGACC
					2281 ACCAAGATGG AGATCGGAGG CGAGGAGGTG GAAGTGGAAG AGTTCGTGGA GGAGGAGGAC
					2341 GAGGACACAG TGGCACCGGT GGTGAGCAAG GGCGAGGAGC TGTTCACCGG GGTGGTGCCC
					2401 ATCCTGGTCG AGCTGGACGG CGACGTAAAC GGCCACAAGT TCAGCGTGTC CGGCGAGGGC
					2461 GAGGGCGATG CCACCTACGG CAAGCTGACC CTGAAGTTCA TCTGCACCAC CGGCAAGCTG
					2521 CCCGTGCCCT GGCCCACCCT CGTGACCACC CTGAGCTGGG GCGTGCAGTG CTTCGCCCGC
					2581 TACCCCGACC ACATGAAGCA GCACGACTTC TTCAAGTCCG CCATGCCCGA AGGCTACGTC
					2641 CAGGAGCGCA CCATCTTCTT CAAGGACGAC GGCAACTACA AGACCCGCGC CGAGGTGAAG
					2701 TTCGAGGGCG ACACCCTGGT GAACCGCATC GAGCTGAAGG GCATCGACTT CAAGGAGGAC
					2761 GGCAACATCC TGGGGCACAA GCTGGAGTAC AACGCCATCC ACGGCAACGT CTATATCACC
					2821 GCCGACAAGC AGAAGAACGG CATCAAGGCC AACTTCGGCC TCAACTGCAA CATCGAGGAC
					2881 GGCAGCGTGC AGCTCGCCGA CCACTACCAG CAGAACACCC CCATCGGCGA CGGCCCCGTG
					2941 CTGCTGCCCG ACAACCACTA CCTGAGCACC CAGTCCAAGC TGAGCAAAGA CCCCAACGAG
					3001 AAGCGCGATC ACATGGTCCT GCTGGAGTTC GTGACCGCCG CCGGGATCAC TCTCGGCATG
					3061 GACGAGCTGT ACAAGTAG

## Sheet: GtACR2-L2-f-Chrimson (HEK cells
Name	GtACR2-L2-f-Chrimson (HEK cells)
Sequence	ATGGCATCACAGGTCGTCTATGGGGAATGGGCATCAACTCACACCGAGTGCTACAATATGTCCAGAATCGACTCCACCTTCGTCTCACTGCTGCAGCTGGTGTGGGCCGTGGTCTCAGGCTGCCAGACAATCTTCATGATTAGCAGGGCTCCCAAGGTCCCTTGGGAGTCCGTGTACCTGCCCTTTGTCGAATCTATCACTTATGCACTGGCCAGTACTGGCAACGGAACCCTGCAGATGAGGGACGGCAGATTCTTTCCTTGGAGCCGAATGGCCTCCTGGCTGTGCACCTGTCCAATCATGCTGGGACAGATTTCTAACATGGCTCTGGTGAAGTACAAAAGTATCCCACTGAATCCCATTGCACAGGCCGCTTCCATCATTAGAGTGGTCATGGGA…
Annotations	GtACR2:	1..873			1 ATGGCATCAC AGGTCGTCTA TGGGGAATGG GCATCAACTC ACACCGAGTG CTACAATATG
	ts:	889..948			61 TCCAGAATCG ACTCCACCTT CGTCTCACTG CTGCAGCTGG TGTGGGCCGT GGTCTCAGGC
	mCerulean3:	958..1668			121 TGCCAGACAA TCTTCATGAT TAGCAGGGCT CCCAAGGTCC CTTGGGAGTC CGTGTACCTG
	ßHK:	1675..1986			181 CCCTTTGTCG AATCTATCAC TTATGCACTG GCCAGTACTG GCAACGGAAC CCTGCAGATG
	Chrimson:	2026..3072			241 AGGGACGGCA GATTCTTTCC TTGGAGCCGA ATGGCCTCCT GGCTGTGCAC CTGTCCAATC
					301 ATGCTGGGAC AGATTTCTAA CATGGCTCTG GTGAAGTACA AAAGTATCCC ACTGAATCCC
					361 ATTGCACAGG CCGCTTCCAT CATTAGAGTG GTCATGGGAA TCACCGCTAC AATTTCTCCC
					421 GCAGAGTATA TGAAGTGGCT GTTCTTTTTC TTTGGGGCCA CCTGCCTGGT GTTCGAGTAC
					481 AGTGTGGTCT TCACAATCTT TCAAGTGGGG CTGTATGGCT TTGAATCTGT CGGGACACCT
					541 CTGGCACAGA AGGTGGTGGT GAGGATCAAG ATGCTGCGCC TGATCTTCTT TATTGCTTGG
					601 ACTATGTTCC CAATCGTGTG GCTGATTTCA CCCACCGGAG TCTGCGTGAT CCACGAGAAC
					661 GTGAGCGCCA TTCTGTACCT GCTGGCTGAC GGCCTGTGCA AAAATACATA TGGAGTGATC
					721 CTGTGGAGCA CTGCCTGGGG AGTGCTGGAA GGGAAGTGGG ACCCCGCATG TCTGCCAGGG
					781 CAGGAGAAAC CCGAAGCCGA CGATCCTTTT GGCCTGAATC ACGAGAAGAA TGCCCCTCCT
					841 AACGACGAAG TCAATATCAG AATGTTTGGA AGGGGACGTA CGGCGGCCAA GAGCAGGATC
					901 ACCAGCGAGG GCGAGTACAT CCCCCTGGAC CAGATCGACA TCAACGTGGC GGTACCCGTG
					961 AGCAAGGGCG AGGAGCTGTT CACCGGGGTG GTGCCCATCC TGGTCGAGCT GGACGGCGAC
					1021 GTAAACGGCC ACAAGTTCAG CGTGTCCGGC GAGGGCGAGG GCGATGCCAC CTACGGCAAG
					1081 CTGACCCTGA AGTTCATCTG CACCACCGGC AAGCTGCCCG TGCCCTGGCC CACCCTCGTG
					1141 ACCACCCTGA GCTGGGGCGT GCAGTGCTTC GCCCGCTACC CCGACCACAT GAAGCAGCAC
					1201 GACTTCTTCA AGTCCGCCAT GCCCGAAGGC TACGTCCAGG AGCGCACCAT CTTCTTCAAG
					1261 GACGACGGCA ACTACAAGAC CCGCGCCGAG GTGAAGTTCG AGGGCGACAC CCTGGTGAAC
					1321 CGCATCGAGC TGAAGGGCAT CGACTTCAAG GAGGACGGCA ACATCCTGGG GCACAAGCTG
					1381 GAGTACAACG CCATCCACGG CAACGTCTAT ATCACCGCCG ACAAGCAGAA GAACGGCATC
					1441 AAGGCCAACT TCGGCCTCAA CTGCAACATC GAGGACGGCA GCGTGCAGCT CGCCGACCAC
					1501 TACCAGCAGA ACACCCCCAT CGGCGACGGC CCCGTGCTGC TGCCCGACAA CCACTACCTG
					1561 AGCACCCAGT CCAAGCTGAG CAAAGACCCC AACGAGAAGC GCGATCACAT GGTCCTGCTG
					1621 GAGTTCGTGA CCGCCGCCGG GATCACTCTC GGCATGGACG AGCTGTATAC CGGTGCAGCC
					1681 CTGCAGGAGA AGAAGTCATG CAGCCAGCGC ATGGCCGAAT TCCGGCAATA CTGTTGGAAC
					1741 CCGGACACTG GGCAGATGCT GGGCCGCACC CCAGCCCGGT GGGTGTGGAT CAGCCTGTAC
					1801 TATGCAGCTT TCTACGTGGT CATGACTGGG CTCTTTGCCT TGTGCATCTA TGTGCTGATG
					1861 CAGACCATTG ATCCCTACAC CCCCGACTAC CAGGACCAGT TAAAGTCACC GGGGGTAACC
					1921 TTGAGACCGG ATGTGTATGG GGAAAGAGGG CTGCAGATTT CCTACAACAT CTCTGAAAAC
					1981 AGCTCTAGAC AGGCCCAGAT CACCGGACGT CCGGAGGGAG CTGTACAAGA GCTGATCAGC
					2041 AGCGCCACCA GATCTCTGTT TGCCGCCGGA GGCATCAACC CTTGGCCTAA CCCCTACCAC
					2101 CACGAGGACA TGGGCTGTGG AGGAATGACA CCTACAGGCG AGTGCTTCAG CACCGAGTGG
					2161 TGGTGTGACC CTTCTTACGG ACTGAGCGAC GCCGGATACG GATATTGCTT CGTGGAGGCC
					2221 ACAGGCGGCT ACCTGGTCGT GGGAGTGGAG AAGAAGCAGG CTTGGCTGCA CAGCAGAGGC
					2281 ACACCAGGAG AAAAGATCGG CGCCCAGGTC TGCCAGTGGA TTGCTTTCAG CATCGCCATC
					2341 GCCCTGCTGA CATTCTACGG CTTCAGCGCC TGGAAGGCCA CTTGCGGTTG GGAGGAGGTC
					2401 TACGTCTGTT GCGTCGAGGT GCTGTTCGTG ACCCTGGAGA TCTTCAAGGA GTTCAGCAGC
					2461 CCCGCCACAG TGTACCTGTC TACCGGCAAC CACGCCTATT GCCTGCGCTA CTTCGAGTGG
					2521 CTGCTGTCTT GCCCCGTGAT CCTGATCAAG CTGAGCAACC TGAGCGGCCT GAAGAACGAC
					2581 TACAGCAAGC GGACCATGGG CCTGATCGTG TCTTGCGTGG GAATGATCGT GTTCGGCATG
					2641 GCCGCAGGAC TGGCTACCGA TTGGCTCAAG TGGCTGCTGT ATATCGTGTC TTGCATCTAC
					2701 GGCGGCTACA TGTACTTCCA GGCCGCCAAG TGCTACGTGG AAGCCAACCA CAGCGTGCCT
					2761 AAAGGCCATT GCCGCATGGT CGTGAAGCTG ATGGCCTACG CTTTCTTCGC CTCTTGGGGC
					2821 ATGTACCCAA TCCTCTGGGC AGTGGGACCA GAAGGACTGC TGAAGCTGAG CCCTTACGCC
					2881 AACAGCATCG GCCACAGCAT CTGCGACATC ATCGCCAAGG AGTTTTGGAC CTTCCTGGCC
					2941 CACCACCTGA GGATCAAGAT CCACGAGCAC ATCCTGATCC ACGGCGACAT CCGGAAGACC
					3001 ACCAAGATGG AGATCGGAGG CGAGGAGGTG GAAGTGGAAG AGTTCGTGGA GGAGGAGGAC
					3061 GAGGACACAG TGTGA

## Sheet: GtACR2-L2-vf-Chrimson (HEK cell
Name	GtACR2-L2-vf-Chrimson (HEK cells)
Sequence	ATGGCATCACAGGTCGTCTATGGGGAATGGGCATCAACTCACACCGAGTGCTACAATATGTCCAGAATCGACTCCACCTTCGTCTCACTGCTGCAGCTGGTGTGGGCCGTGGTCTCAGGCTGCCAGACAATCTTCATGATTAGCAGGGCTCCCAAGGTCCCTTGGGAGTCCGTGTACCTGCCCTTTGTCGAATCTATCACTTATGCACTGGCCAGTACTGGCAACGGAACCCTGCAGATGAGGGACGGCAGATTCTTTCCTTGGAGCCGAATGGCCTCCTGGCTGTGCACCTGTCCAATCATGCTGGGACAGATTTCTAACATGGCTCTGGTGAAGTACAAAAGTATCCCACTGAATCCCATTGCACAGGCCGCTTCCATCATTAGAGTGGTCATGGGA…
Annotations	GtACR2:	1..873			1 ATGGCATCAC AGGTCGTCTA TGGGGAATGG GCATCAACTC ACACCGAGTG CTACAATATG
	ts:	889..948			61 TCCAGAATCG ACTCCACCTT CGTCTCACTG CTGCAGCTGG TGTGGGCCGT GGTCTCAGGC
	mCerulean3:	958..1668			121 TGCCAGACAA TCTTCATGAT TAGCAGGGCT CCCAAGGTCC CTTGGGAGTC CGTGTACCTG
	ßHK:	1675..1986			181 CCCTTTGTCG AATCTATCAC TTATGCACTG GCCAGTACTG GCAACGGAAC CCTGCAGATG
	Chrimson:	2026..3072			241 AGGGACGGCA GATTCTTTCC TTGGAGCCGA ATGGCCTCCT GGCTGTGCAC CTGTCCAATC
					301 ATGCTGGGAC AGATTTCTAA CATGGCTCTG GTGAAGTACA AAAGTATCCC ACTGAATCCC
					361 ATTGCACAGG CCGCTTCCAT CATTAGAGTG GTCATGGGAA TCACCGCTAC AATTTCTCCC
					421 GCAGAGTATA TGAAGTGGCT GTTCTTTTTC TTTGGGGCCA CCTGCCTGGT GTTCGAGTAC
					481 AGTGTGGTCT TCACAATCTT TCAAGTGGGG CTGTATGGCT TTGAATCTGT CGGGACACCT
					541 CTGGCACAGA AGGTGGTGGT GAGGATCAAG ATGCTGCGCC TGATCTTCTT TATTGCTTGG
					601 ACTATGTTCC CAATCGTGTG GCTGATTTCA CCCACCGGAG TCTGCGTGAT CCACGAGAAC
					661 GTGAGCGCCA TTCTGTACCT GCTGGCTGAC GGCCTGTGCA AAAATACATA TGGAGTGATC
					721 CTGTGGAGCA CTGCCTGGGG AGTGCTGGAA GGGAAGTGGG ACCCCGCATG TCTGCCAGGG
					781 CAGGAGAAAC CCGAAGCCGA CGATCCTTTT GGCCTGAATC ACGAGAAGAA TGCCCCTCCT
					841 AACGACGAAG TCAATATCAG AATGTTTGGA AGGGGACGTA CGGCGGCCAA GAGCAGGATC
					901 ACCAGCGAGG GCGAGTACAT CCCCCTGGAC CAGATCGACA TCAACGTGGC GGTACCCGTG
					961 AGCAAGGGCG AGGAGCTGTT CACCGGGGTG GTGCCCATCC TGGTCGAGCT GGACGGCGAC
					1021 GTAAACGGCC ACAAGTTCAG CGTGTCCGGC GAGGGCGAGG GCGATGCCAC CTACGGCAAG
					1081 CTGACCCTGA AGTTCATCTG CACCACCGGC AAGCTGCCCG TGCCCTGGCC CACCCTCGTG
					1141 ACCACCCTGA GCTGGGGCGT GCAGTGCTTC GCCCGCTACC CCGACCACAT GAAGCAGCAC
					1201 GACTTCTTCA AGTCCGCCAT GCCCGAAGGC TACGTCCAGG AGCGCACCAT CTTCTTCAAG
					1261 GACGACGGCA ACTACAAGAC CCGCGCCGAG GTGAAGTTCG AGGGCGACAC CCTGGTGAAC
					1321 CGCATCGAGC TGAAGGGCAT CGACTTCAAG GAGGACGGCA ACATCCTGGG GCACAAGCTG
					1381 GAGTACAACG CCATCCACGG CAACGTCTAT ATCACCGCCG ACAAGCAGAA GAACGGCATC
					1441 AAGGCCAACT TCGGCCTCAA CTGCAACATC GAGGACGGCA GCGTGCAGCT CGCCGACCAC
					1501 TACCAGCAGA ACACCCCCAT CGGCGACGGC CCCGTGCTGC TGCCCGACAA CCACTACCTG
					1561 AGCACCCAGT CCAAGCTGAG CAAAGACCCC AACGAGAAGC GCGATCACAT GGTCCTGCTG
					1621 GAGTTCGTGA CCGCCGCCGG GATCACTCTC GGCATGGACG AGCTGTATAC CGGTGCAGCC
					1681 CTGCAGGAGA AGAAGTCATG CAGCCAGCGC ATGGCCGAAT TCCGGCAATA CTGTTGGAAC
					1741 CCGGACACTG GGCAGATGCT GGGCCGCACC CCAGCCCGGT GGGTGTGGAT CAGCCTGTAC
					1801 TATGCAGCTT TCTACGTGGT CATGACTGGG CTCTTTGCCT TGTGCATCTA TGTGCTGATG
					1861 CAGACCATTG ATCCCTACAC CCCCGACTAC CAGGACCAGT TAAAGTCACC GGGGGTAACC
					1921 TTGAGACCGG ATGTGTATGG GGAAAGAGGG CTGCAGATTT CCTACAACAT CTCTGAAAAC
					1981 AGCTCTAGAC AGGCCCAGAT CACCGGACGT CCGGAGGGAG CTGTACAAGA GCTGATCAGC
					2041 AGCGCCACCA GATCTCTGTT TGCCGCCGGA GGCATCAACC CTTGGCCTAA CCCCTACCAC
					2101 CACGAGGACA TGGGCTGTGG AGGAATGACA CCTACAGGCG AGTGCTTCAG CACCGAGTGG
					2161 TGGTGTGACC CTTCTTACGG ACTGAGCGAC GCCGGATACG GATATTGCTT CGTGGAGGCC
					2221 ACAGGCGGCT ACCTGGTCGT GGGAGTGGAG AAGAAGCAGG CTTGGCTGCA CAGCAGAGGC
					2281 ACACCAGGAG AAAAGATCGG CGCCCAGGTC TGCCAGTGGA TTGCTTTCAG CATCGCCATC
					2341 GCCCTGCTGA CATTCTACGG CTTCAGCGCC TGGAAGGCCA CTTGCGGTTG GGAGGAGGTC
					2401 TACGTCTGTT GCGTCGAGGT GCTGTTCGTG ACCCTGGAGA TCTTCAAGGA GTTCAGCAGC
					2461 CCCGCCACAG TGTACCTGTC TACCGGCAAC CACGCCTATT GCCTGCGCTA CTTCGAGTGG
					2521 CTGCTGTCTT GCCCCGTGAT CCTGATCCGG CTGAGCAACC TGAGCGGCCT GAAGAACGAC
					2581 TACAGCAAGC GGACCATGGG CCTGATCGTG TCTTGCGTGG GAATGATCGT GTTCGGCATG
					2641 GCCGCAGGAC TGGCTACCGA TTGGCTCAAG TGGCTGCTGT ATATCGTGTC TTGCATCTAC
					2701 GGCGGCTACA TGTACTTCCA GGCCGCCAAG TGCTACGTGG AAGCCAACCA CAGCGTGCCT
					2761 AAAGGCCATT GCCGCATGGT CGTGAAGCTG ATGGCCTACG CTTTCTTCGC CTCTTGGGGC
					2821 ATGTACCCAA TCCTCTGGGC AGTGGGACCA GAAGGACTGC TGAAGCTGAG CCCTTACGCC
					2881 AACAGCATCG GCCACAGCAT CTGCGACATC ATCGCCAAGG AGTTTTGGAC CTTCCTGGCC
					2941 CACCACCTGA GGATCAAGAT CCACGAGCAC ATCCTGATCC ACGGCGACAT CCGGAAGACC
					3001 ACCAAGATGG AGATCGGAGG CGAGGAGGTG GAAGTGGAAG AGTTCGTGGA GGAGGAGGAC
					3061 GAGGACACAG TGTGA

[truncated: 19 more sheets: GtACR2-L2-BreachES (HEK cells), GtACR2-L2-ChRmine (HEK cells), GtACR2-L4-ChRmine-ts-eYFP-er (H, BiPOLES-mCerulean (neurons), somBiPOLES-mCerulean (neurons), somGtACR2-mCerulean (neurons), eNPAC2.0 (neurons), CheRiff-ts-mScarlet-ER (neurons, H2B-EGFP (neurons), Cre (neurons), Chrimson-mCerulean (neurons), Human Synapsin I promoter  , mDlx-Promter, hSyn-DIO, CamKIIa(0.4)-Promoter, CamKIIa(0.4)-DO-Promoter, CamKII-Promotor, Primer sequences (HEK cells), Primer sequences (neurons)]
